# Supplementary material
Source: publisher figshare collection journal article supplement (https://acs.figshare.com/ndownloader/files/7600102)

# Transition-Metal-Free Alkynylation of 2-Oxindoles through Radical-Radical Coupling

Hong-Yan Huang,<sup>†,‡</sup> Liang Cheng<sup>†,‡,\*</sup> Jie-Jie Liu, <sup>†,‡</sup> Dong Wang,<sup>†</sup> Li Liu,<sup>†,‡,\*</sup> Chao-Jun Li<sup>§,\*</sup>

<sup>†</sup>Beijing National Laboratory for Molecular Sciences (BNLMS), CAS Key Laboratory of Molecular Recognition and Function, Institute of Chemistry, Chinese Academy of Sciences, Beijing 100190, China

<sup>‡</sup>University of Chinese Academy of Sciences, Beijing 100049, China

<sup>§</sup>Department of Chemistry, McGill University, 801 Sherbrooke Street West, Montreal, Quebec, H3A 0B8, Canada

| <b>Table of Contents</b>                                                   | <b>Pages</b> |
|----------------------------------------------------------------------------|--------------|
| 1 General information                                                      | S2           |
| 2 Reactions of 2-oxindole with other kinds of alkynylation reagents        | S3           |
| 3 <sup>1</sup> H and <sup>13</sup> C NMR spectra of compounds <b>3a-3z</b> | S4-S29       |
| 4 <sup>1</sup> H, <sup>13</sup> C and 2D NMR spectra of compound <b>7</b>  | S30-S31      |
| 5 <sup>1</sup> H and <sup>13</sup> C NMR spectra of compound <b>10</b>     | S32          |
| 6 <sup>1</sup> H, <sup>13</sup> C and 2D NMR spectra of compound <b>11</b> | S33-S34      |
| 7 <sup>1</sup> H, <sup>13</sup> C and 2D NMR spectra of compound <b>12</b> | S35-S36      |

## General Information

All chemicals were obtained from commercial sources and were used as received unless otherwise noted. TLC analysis was performed on pre-coated, glass-backed silica gel plates and visualized with UV light. Column chromatography was performed on silica gel (200-300 mesh) using ethyl acetate (EA)/petroleum ether (PE).  $^1\text{H}$ ,  $^{13}\text{C}$  and 2D-NMR Spectra were obtained on a Bruker 300 MHz, 400 MHz or 500 MHz NMR spectrometer in the deuterated solvents indicated. Chemical shifts are reported in ppm from tetramethylsilane with the solvent resonance as the internal standard. The following abbreviations were used to designate chemical shift multiplicities: s= singlet, d= doublet, t= triplet, q= quartet, h= heptet, m= multiplet. All first-order splitting patterns were assigned on the basis of the appearance of the multiplet. Splitting patterns that could not be easily interpreted are designated as multiplet (m) or broad (br). Melting points were measured on Beijing Tech X-4 apparatus without correction. IR spectra were recorded on a Nicolet 6700 FT-IR spectrometer. HRMS were obtained using electrospray ionization (ESI)-Orbitrap.

**Table S1 Reactions of 2-oxindole with other kinds of alkynylation reagents<sup>a</sup>**

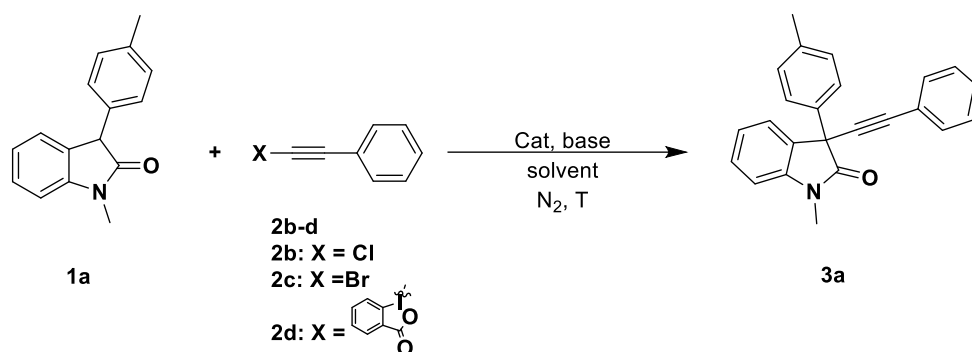

| Entry | <b>2</b>  | <b>1a:2</b> | Cat.                                                     | base                                     | solvent                                         | T/°C   | t/h | Yield of <b>3a</b> / % <sup>b</sup> |
|-------|-----------|-------------|----------------------------------------------------------|------------------------------------------|-------------------------------------------------|--------|-----|-------------------------------------|
| 1     | <b>2b</b> | 1:1.5       | Sc(OTf) <sub>3</sub><br>(0.2)                            | Na <sub>2</sub> CO <sub>3</sub><br>(2.0) | DCM                                             | r.t.   | 24  | N.R. <sup>e</sup>                   |
| 2     | <b>2b</b> | 1:1.5       | n-Bu <sub>4</sub> N <sup>+</sup> I <sup>-</sup><br>(0.2) | KF<br>(33%w) <sup>c</sup>                | oxylene/CHCl <sub>3</sub><br>(7:1) <sup>d</sup> | r.t.   | 12  | N.R.                                |
| 3     | <b>2b</b> | 1:3         | --                                                       | NaOAc<br>(2.0)                           | PhCl                                            | 120 °C | 24  | N.P. <sup>f</sup>                   |
| 4     | <b>2c</b> | 1:1.5       | Sc(OTf) <sub>3</sub><br>(0.2)                            | Na <sub>2</sub> CO <sub>3</sub><br>(2.0) | DCM                                             | r.t.   | 12  | N.R.                                |
| 5     | <b>2c</b> | 1:1.5       | n-Bu <sub>4</sub> N <sup>+</sup> I <sup>-</sup><br>(0.2) | KF (33%w) <sup>c</sup>                   | oxylene/CHCl <sub>3</sub><br>(7:1) <sup>d</sup> | r.t.   | 24  | N.R.                                |
| 6     | <b>2c</b> | 1:3         | --                                                       | NaOAc<br>(2.0)                           | PhCl                                            | 120 °C | 12  | N.P.                                |
| 7     | <b>2d</b> | 1:1.5       | DABCO<br>(0.2)                                           | --                                       | DMF                                             | r.t.   | 24  | 38                                  |
| 8     | <b>2d</b> | 1:3         | --                                                       | NaOAc<br>(2.0)                           | PhCl                                            | 120 °C | 12  | 9                                   |

<sup>a</sup>Unless noted, the reaction was carried out with **1a** (0.1 mmol), **2** (x mmol), catalyst (y mol %), base (2.0 equiv) in 2 mL of solvent under N<sub>2</sub>. <sup>b</sup>Isolated yields. <sup>c</sup>1ml of aqueous solution. <sup>d</sup>1ml of solvents. <sup>e</sup>N.P. = no product. <sup>f</sup>N.R. = no reaction.

3a

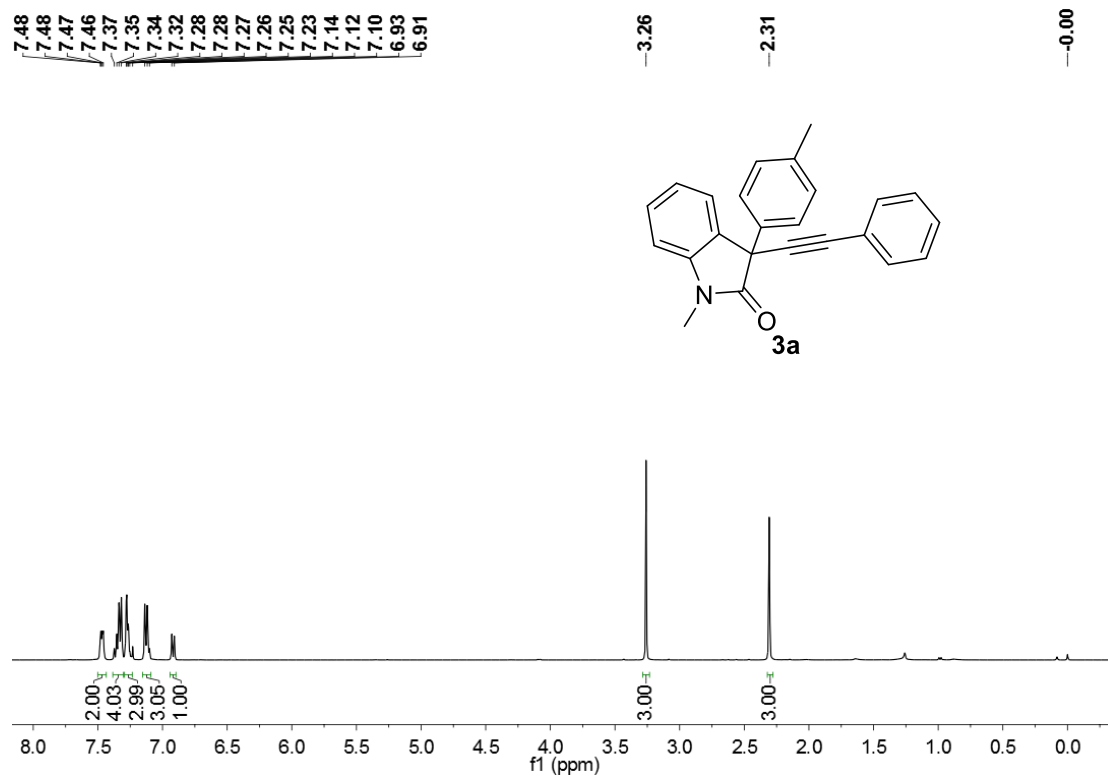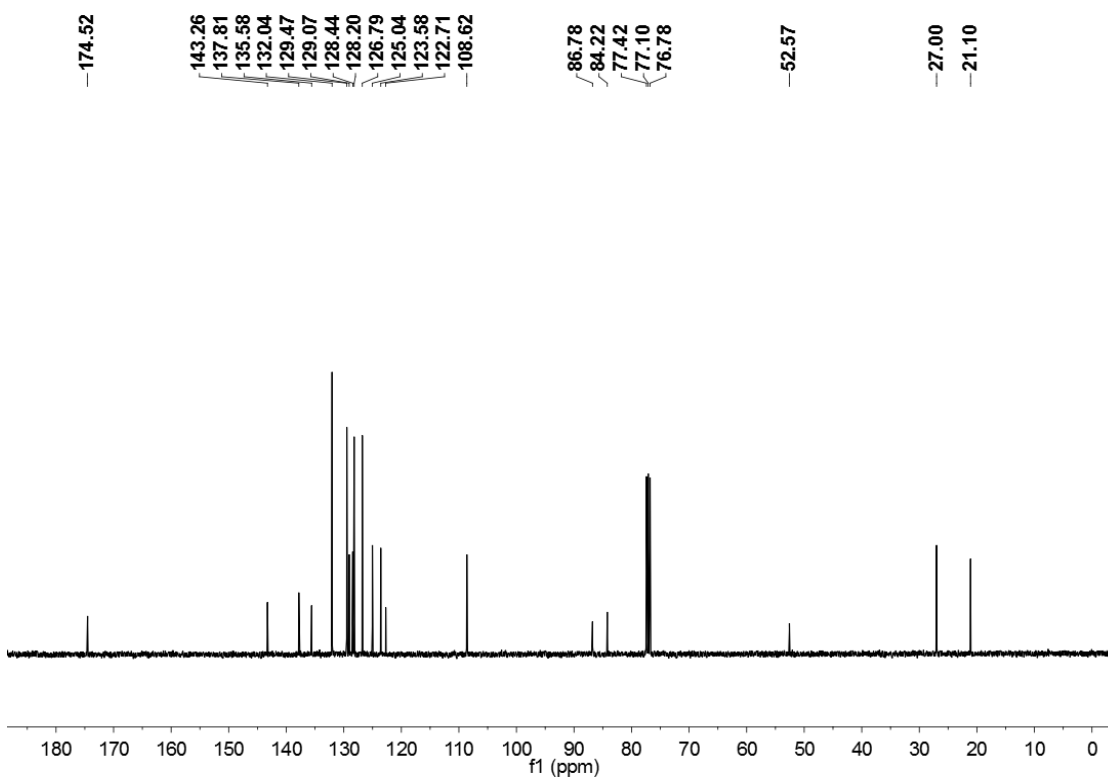

# 3b

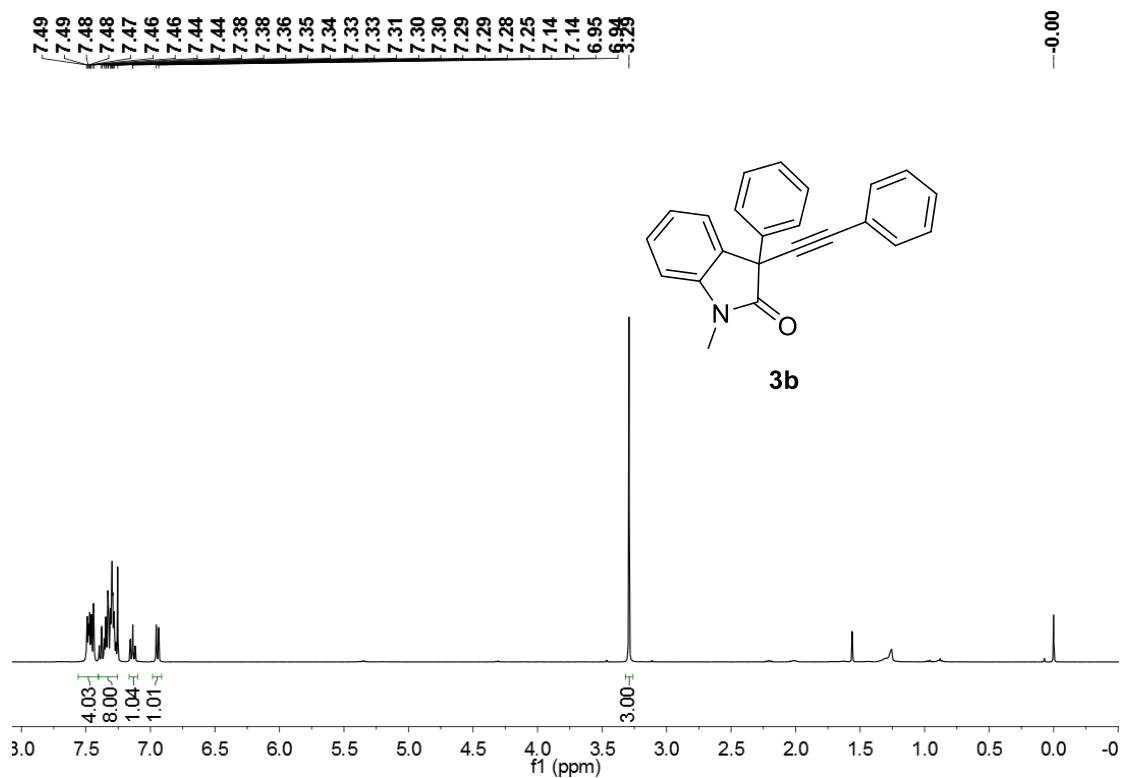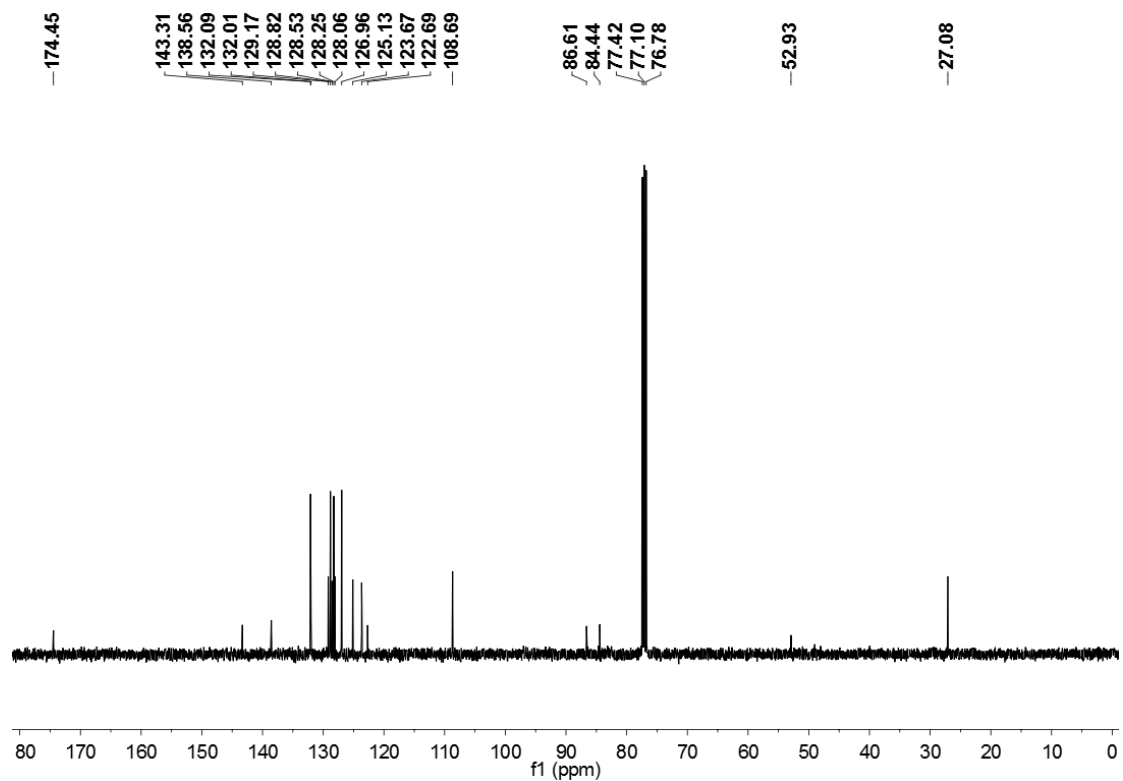

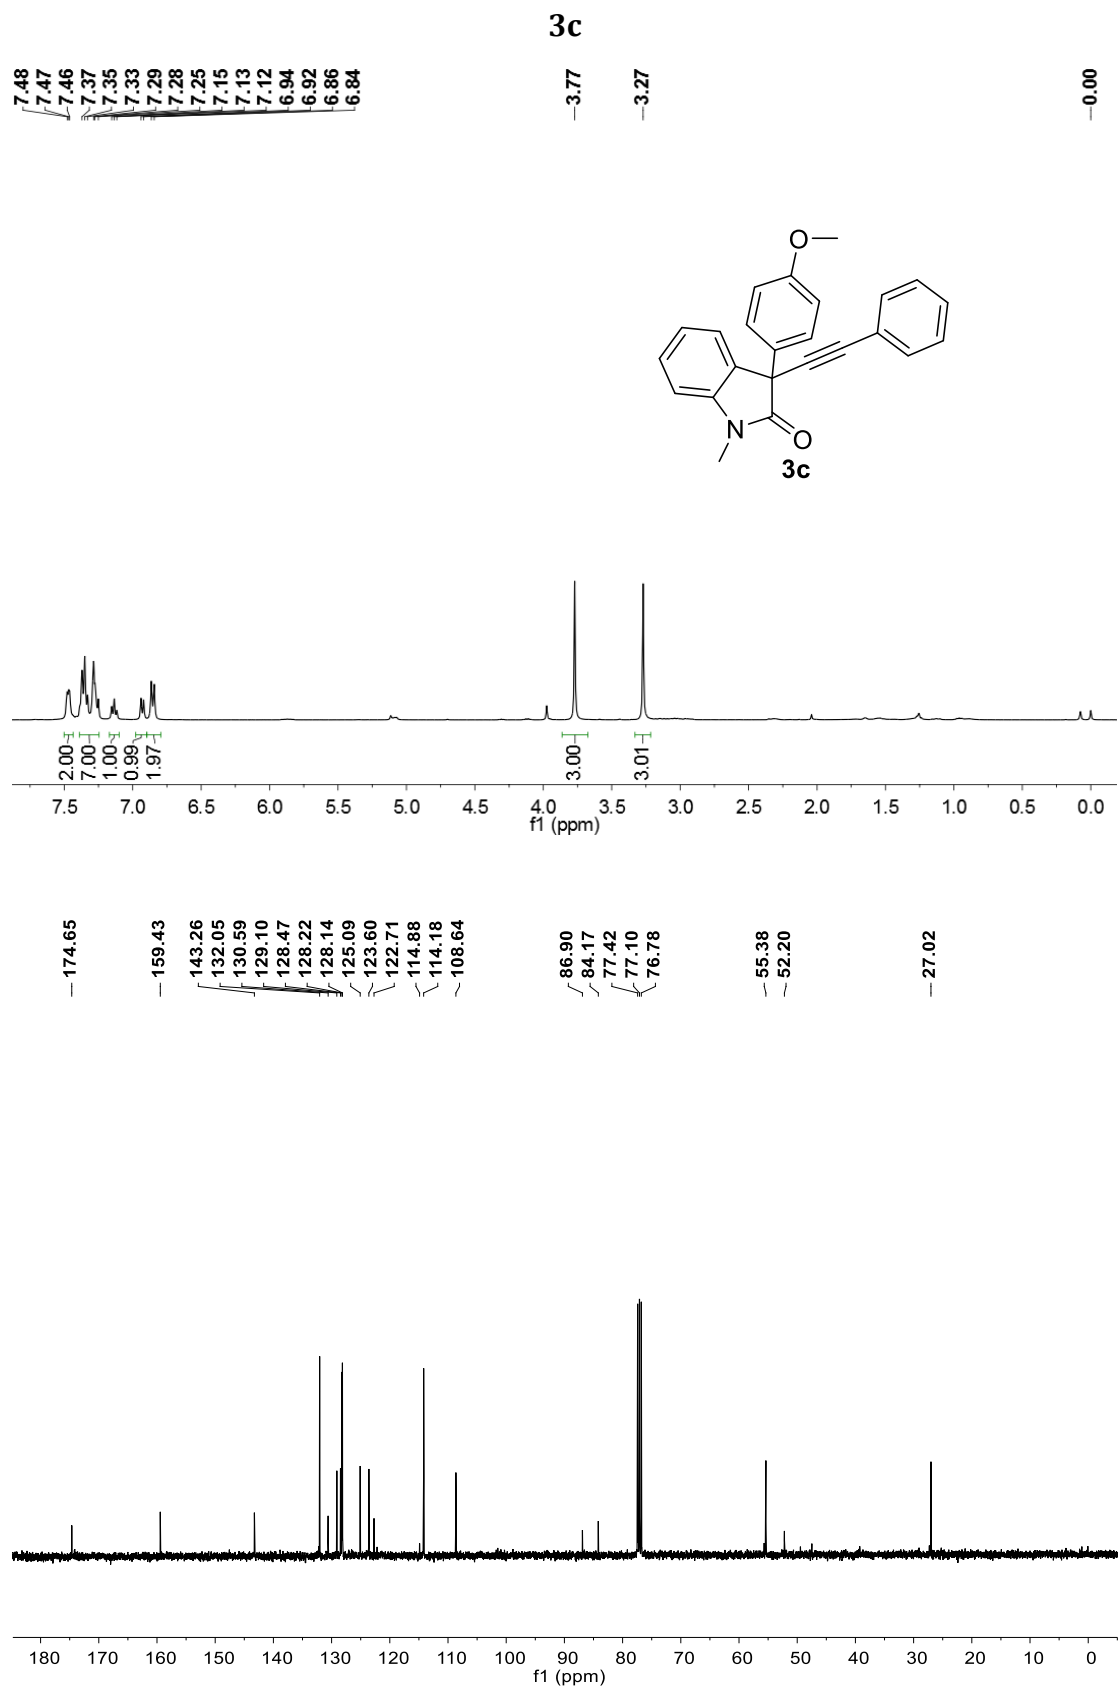

# 3d

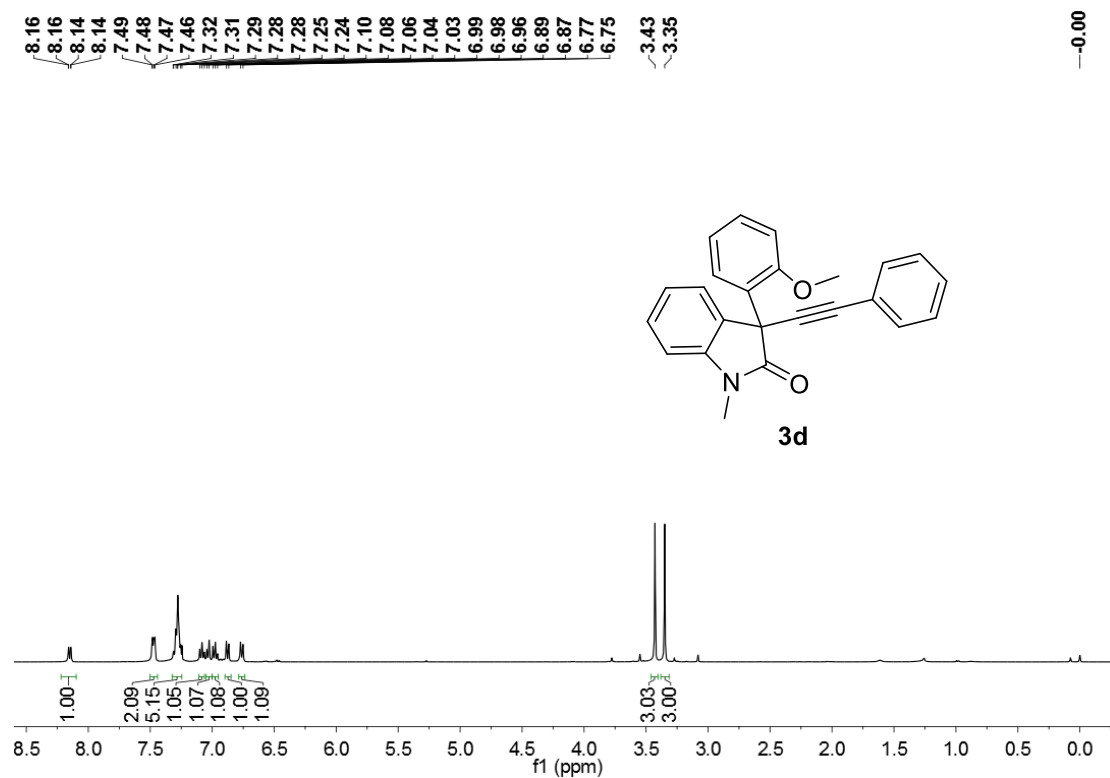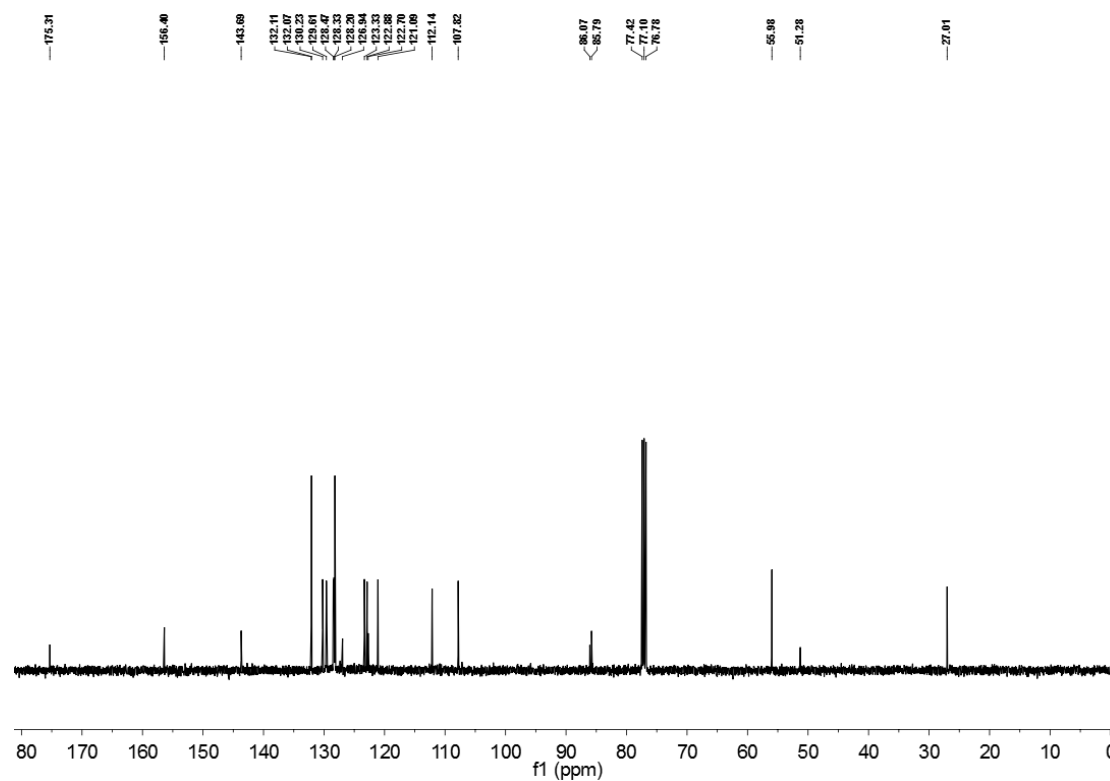

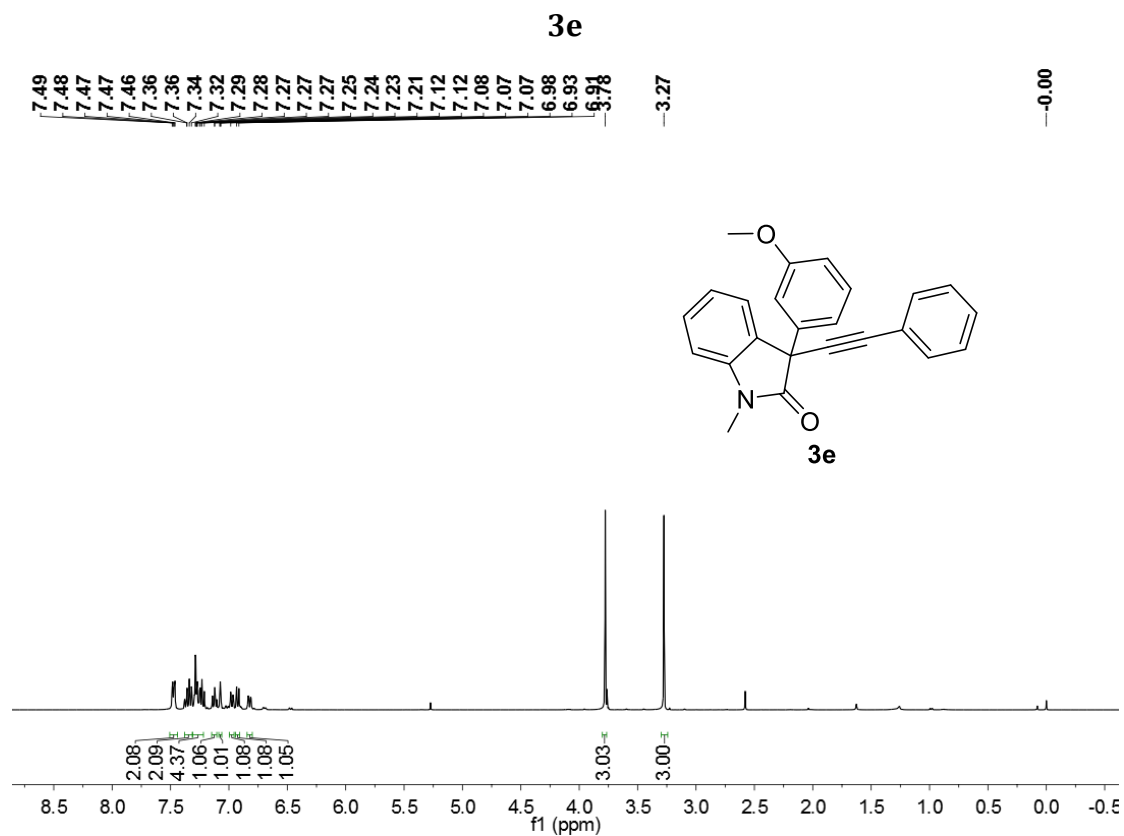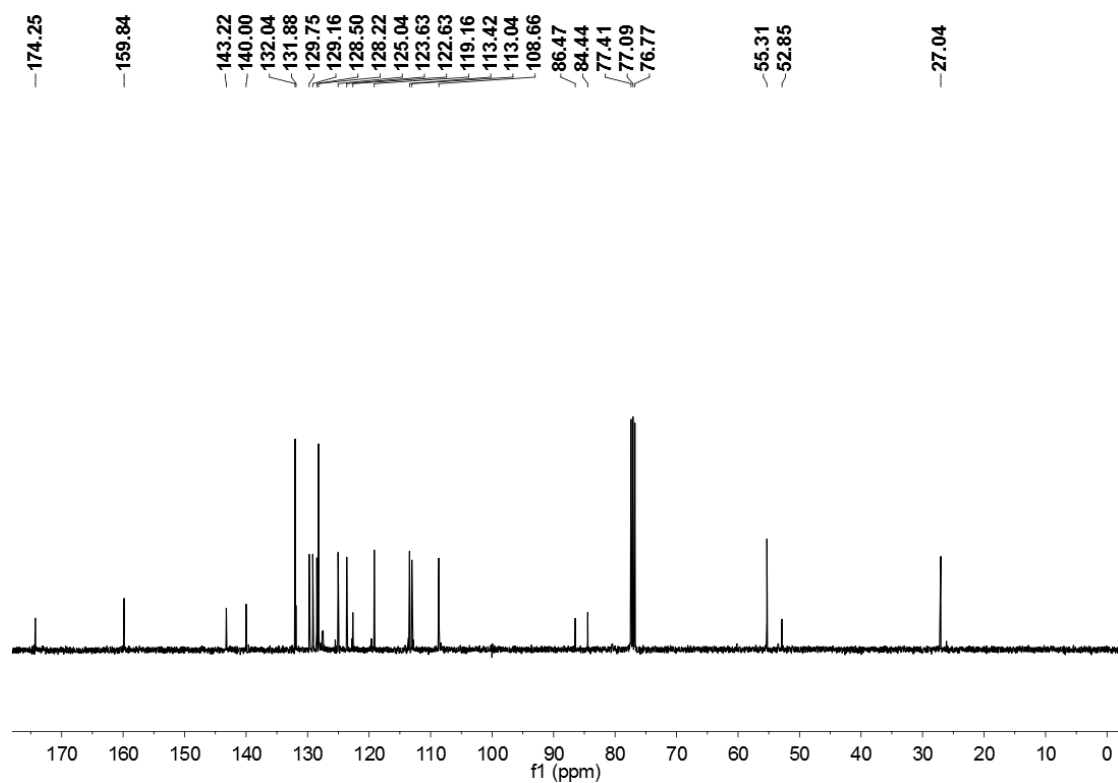



3f

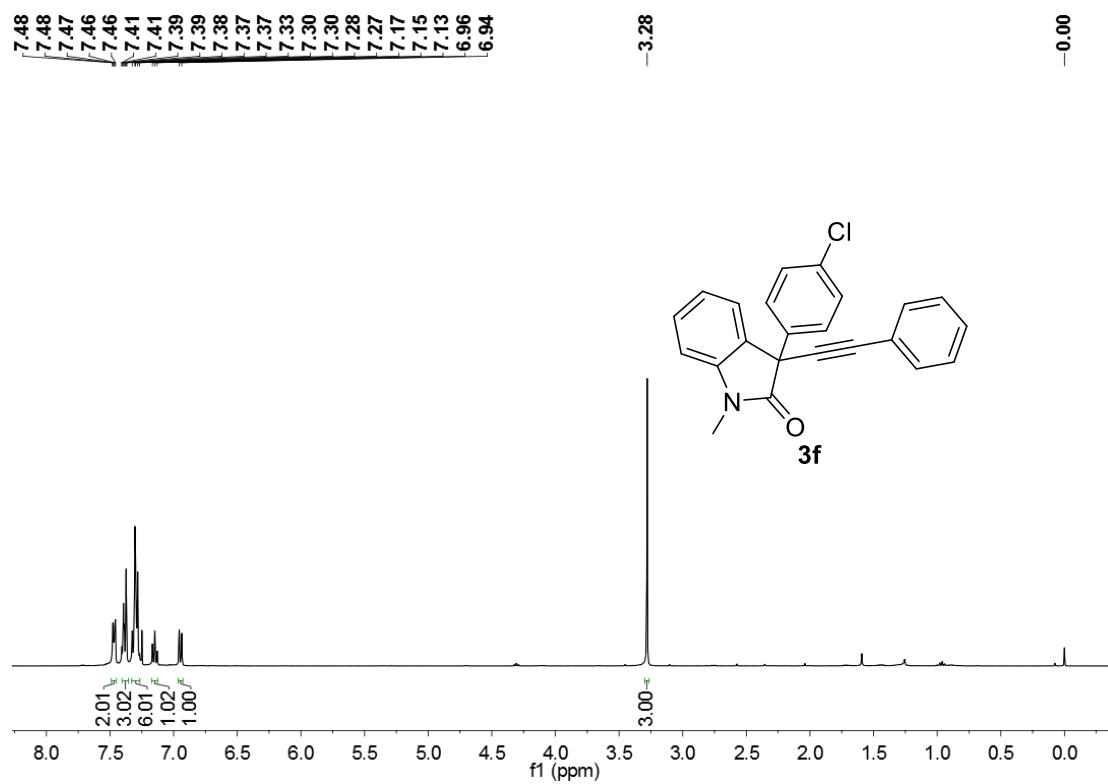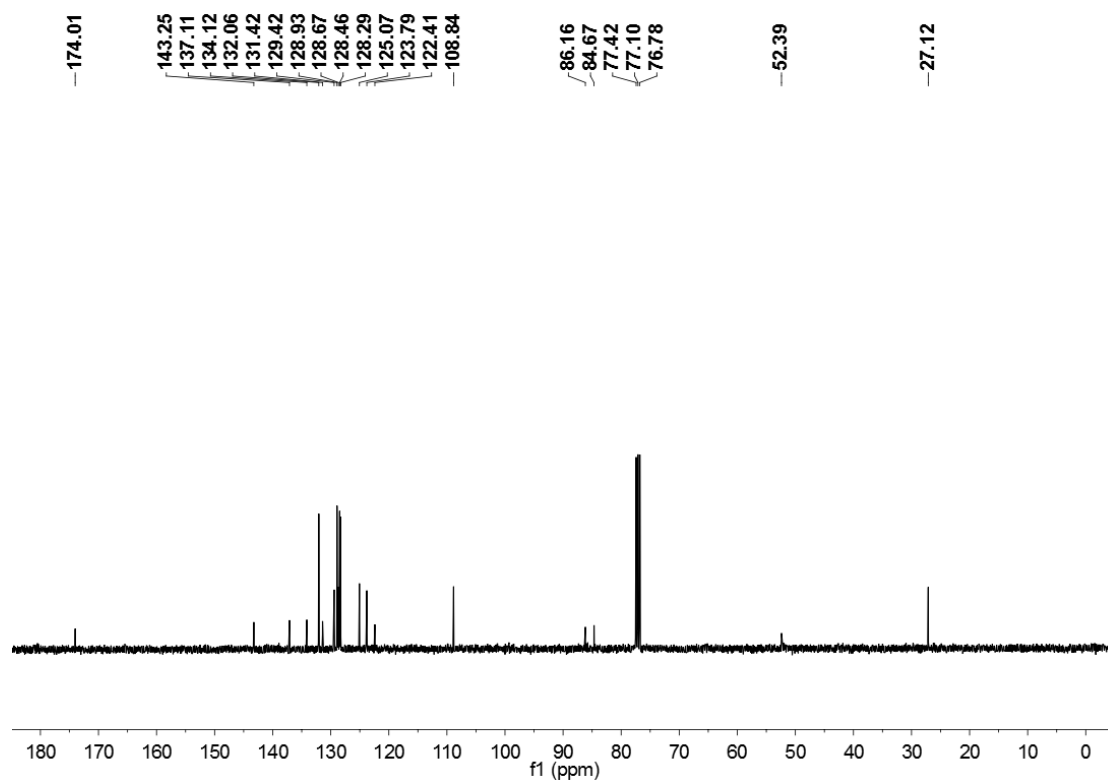

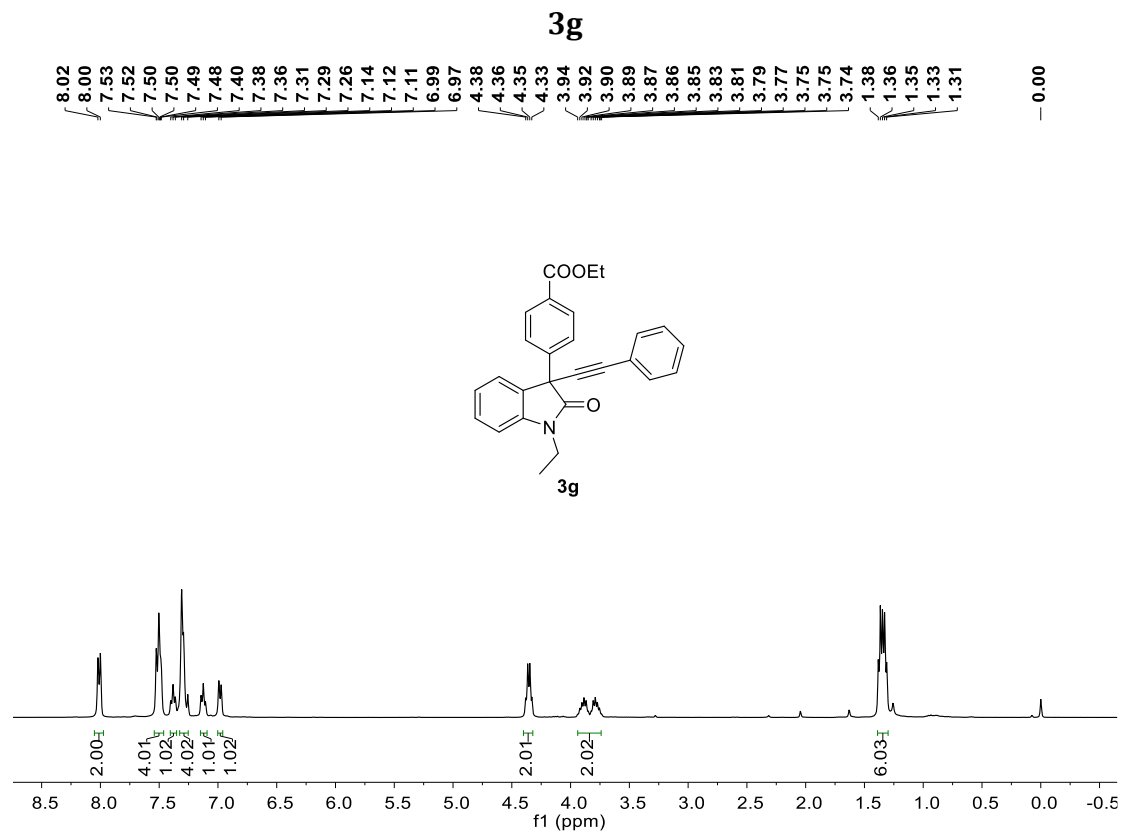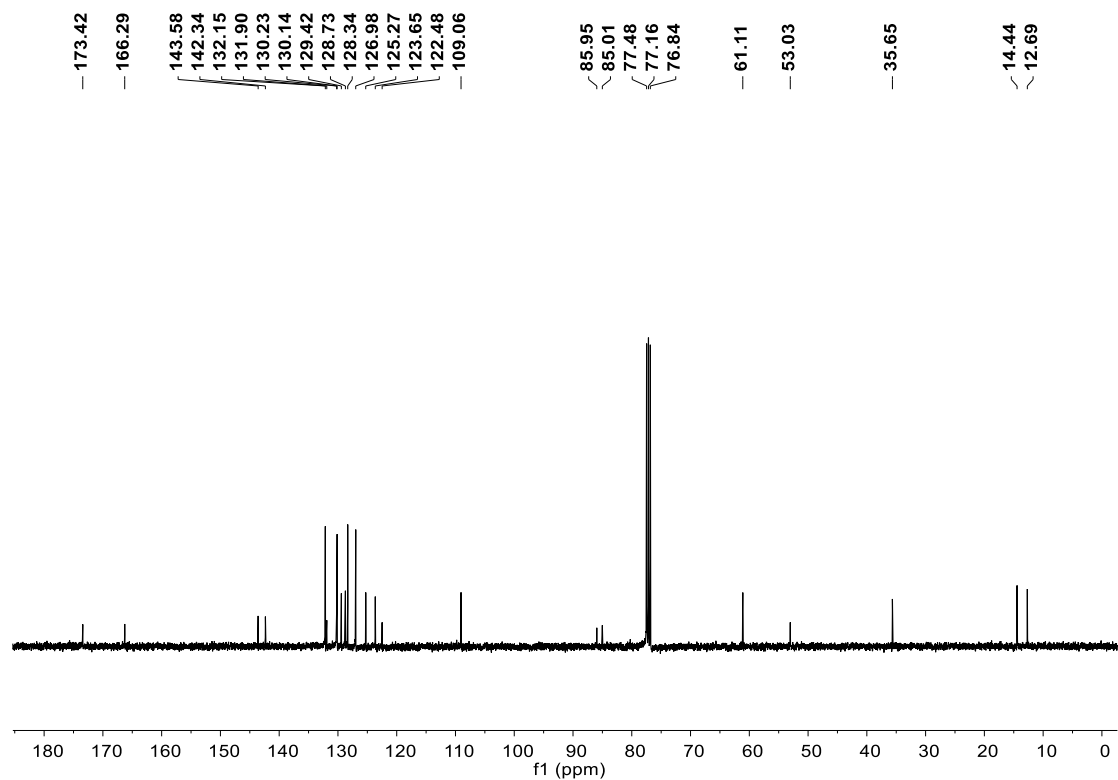

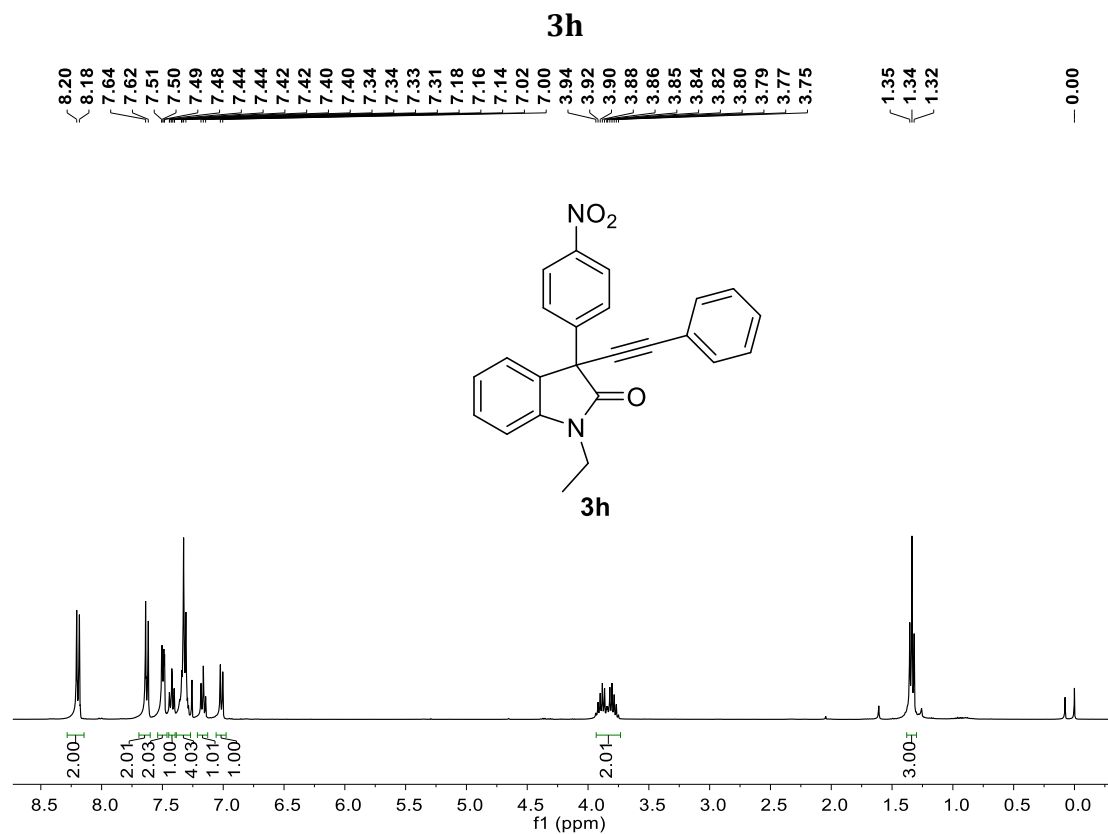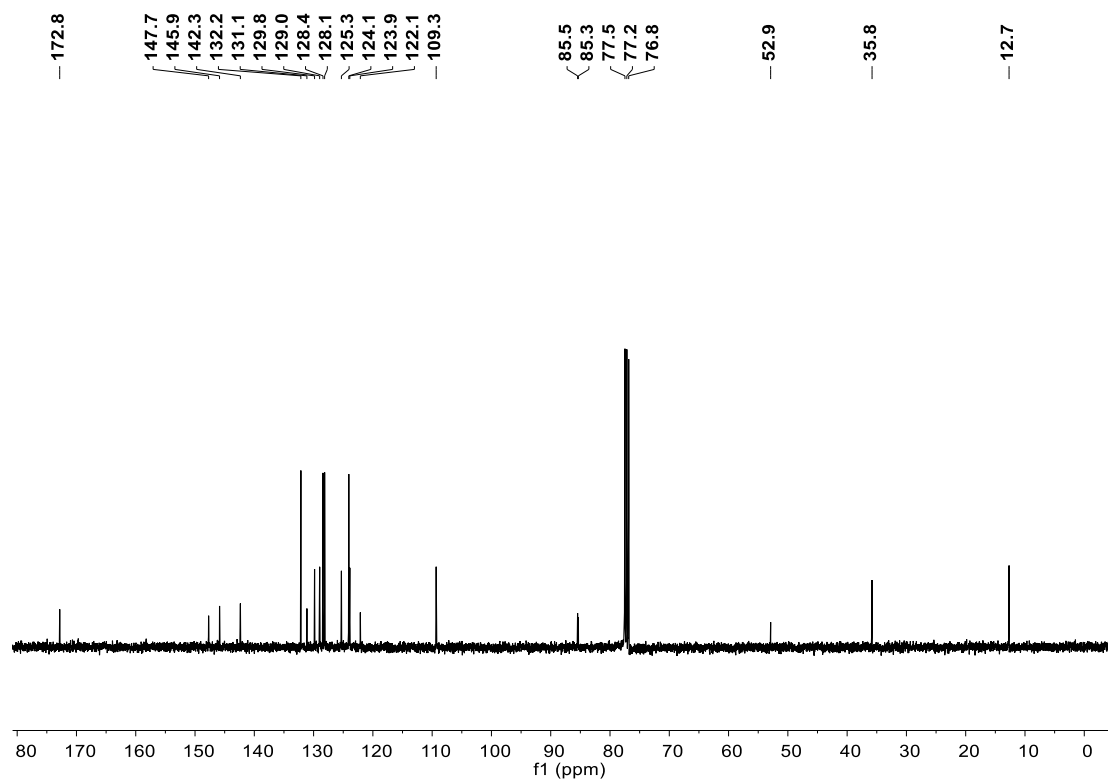

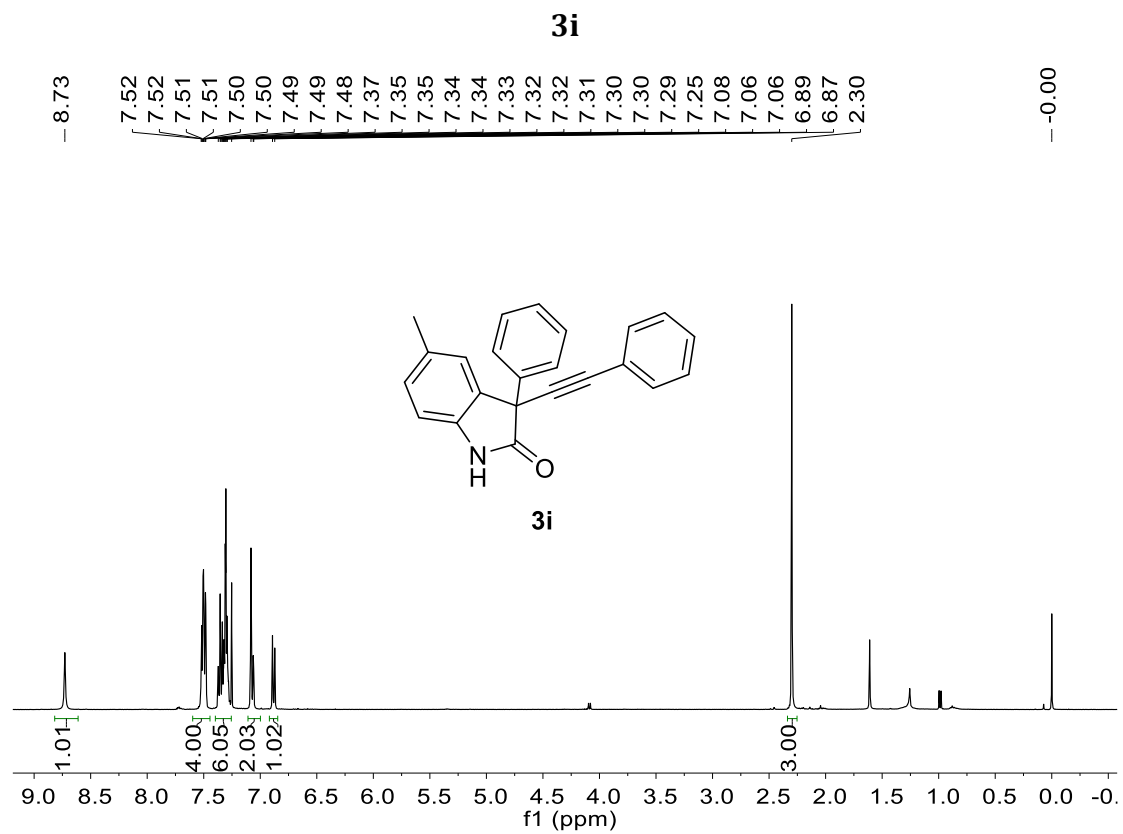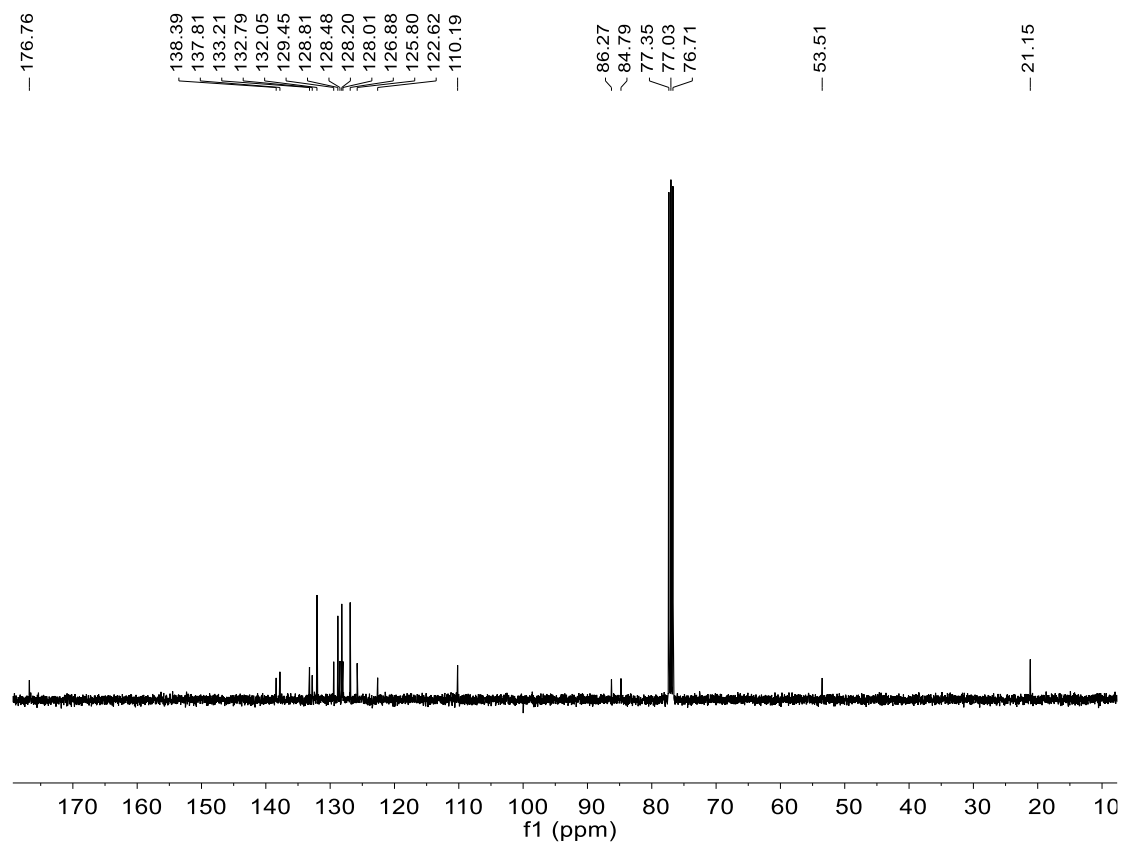

c1ccccc1C#CC2(c3ccccc3)C(=O)Nc4ccccc24

**3j**

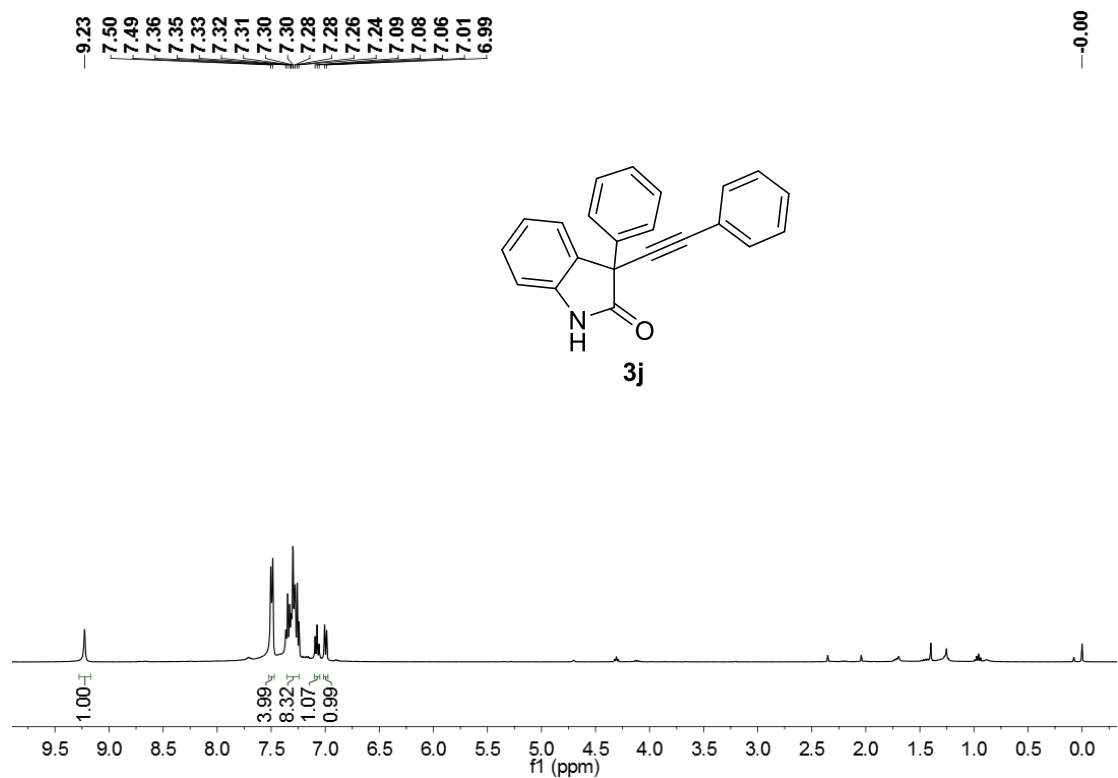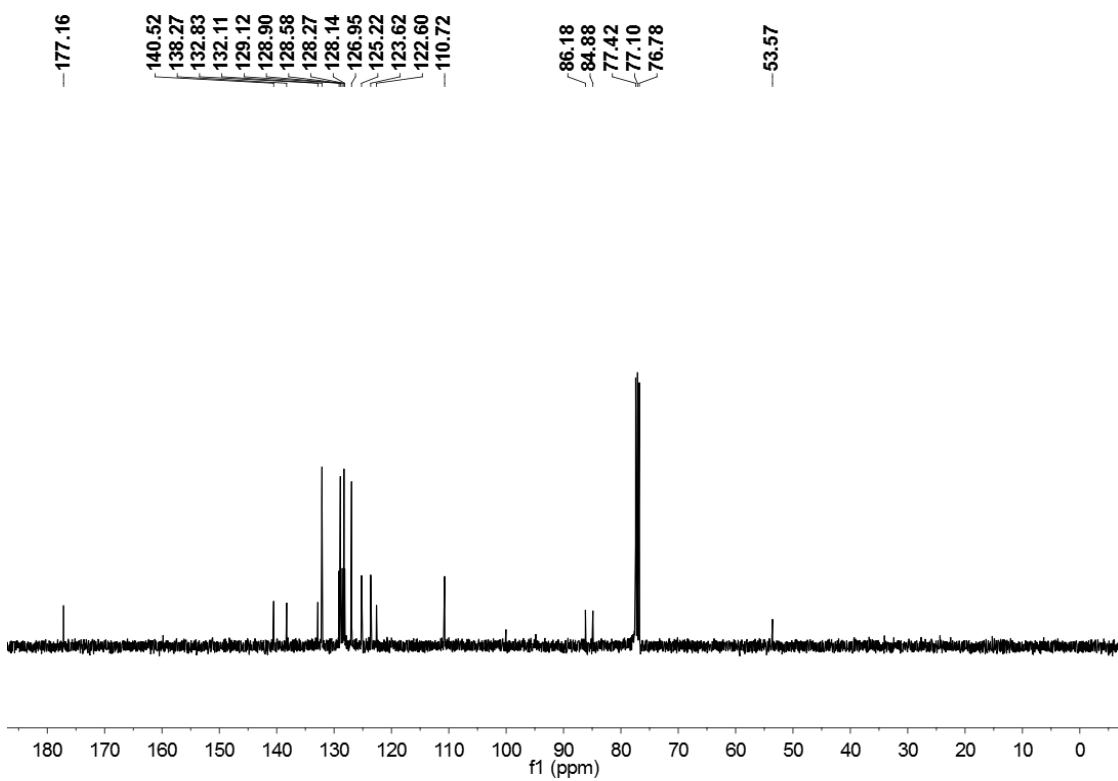

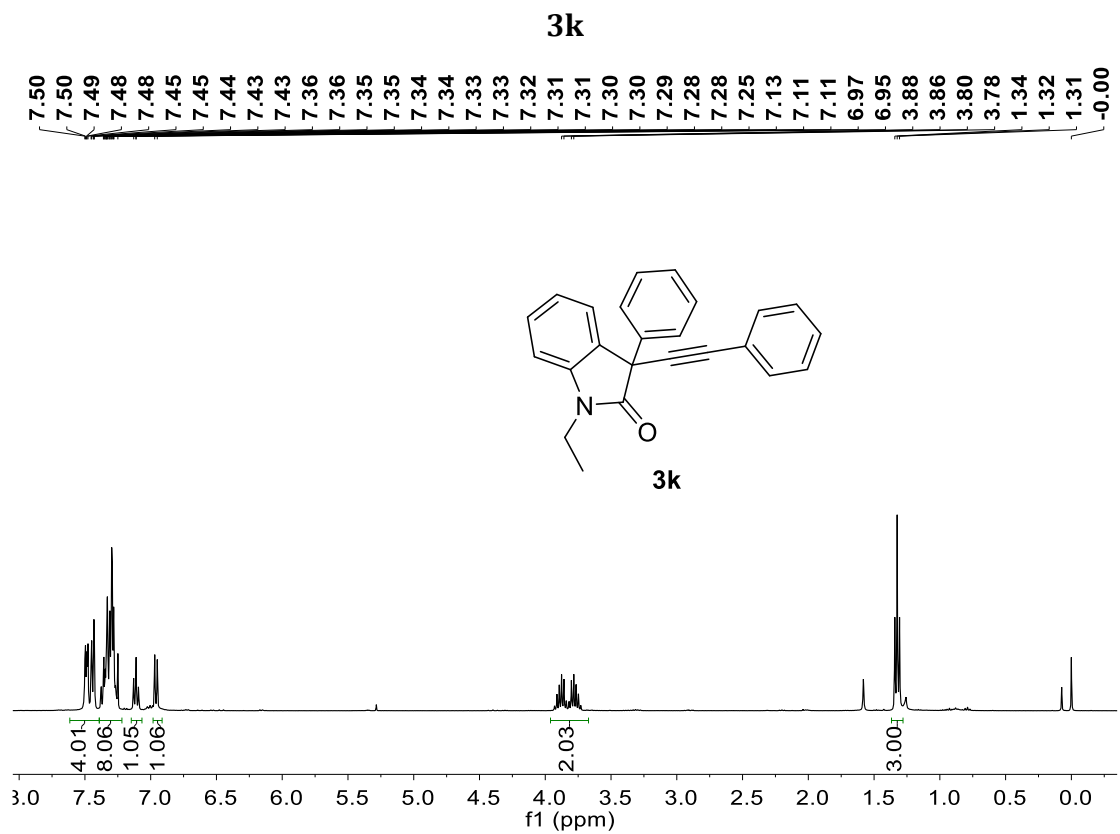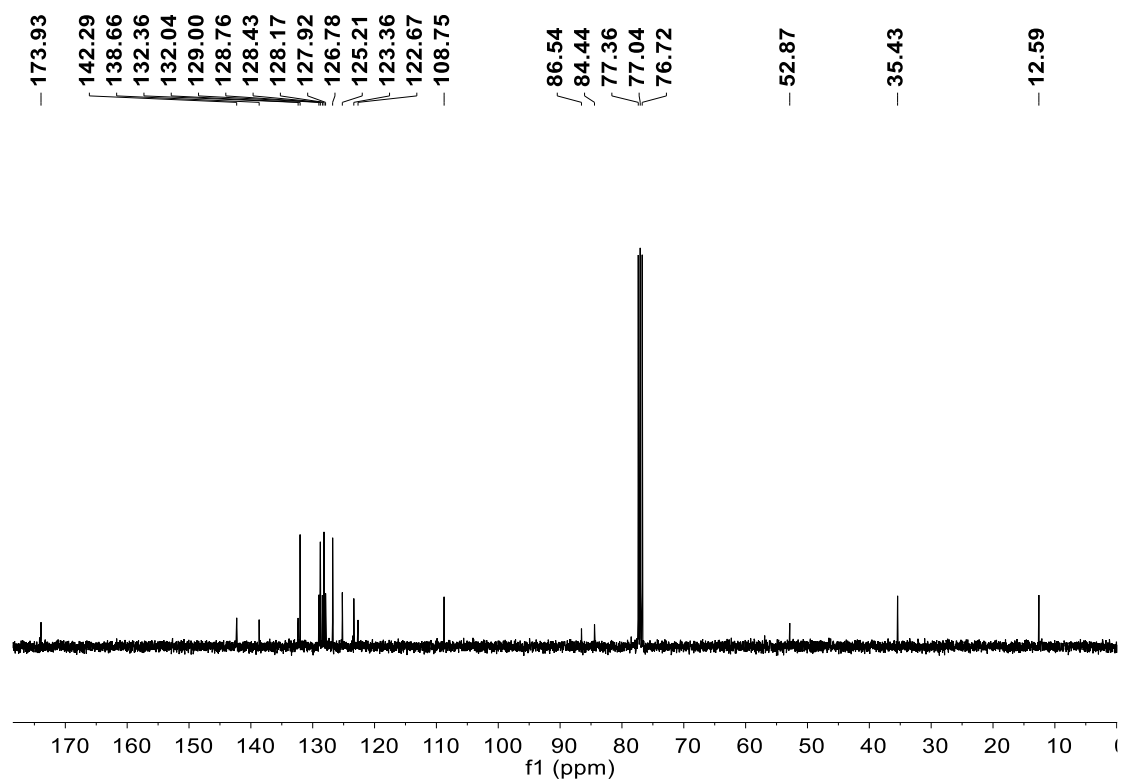

31

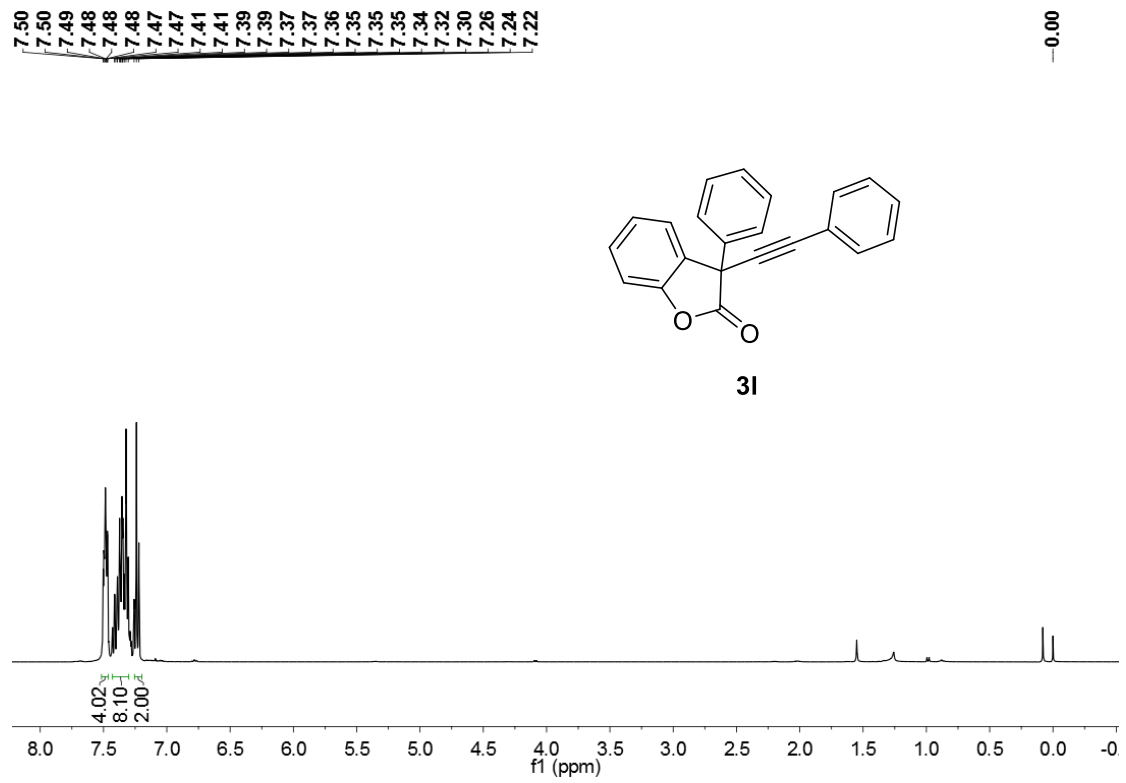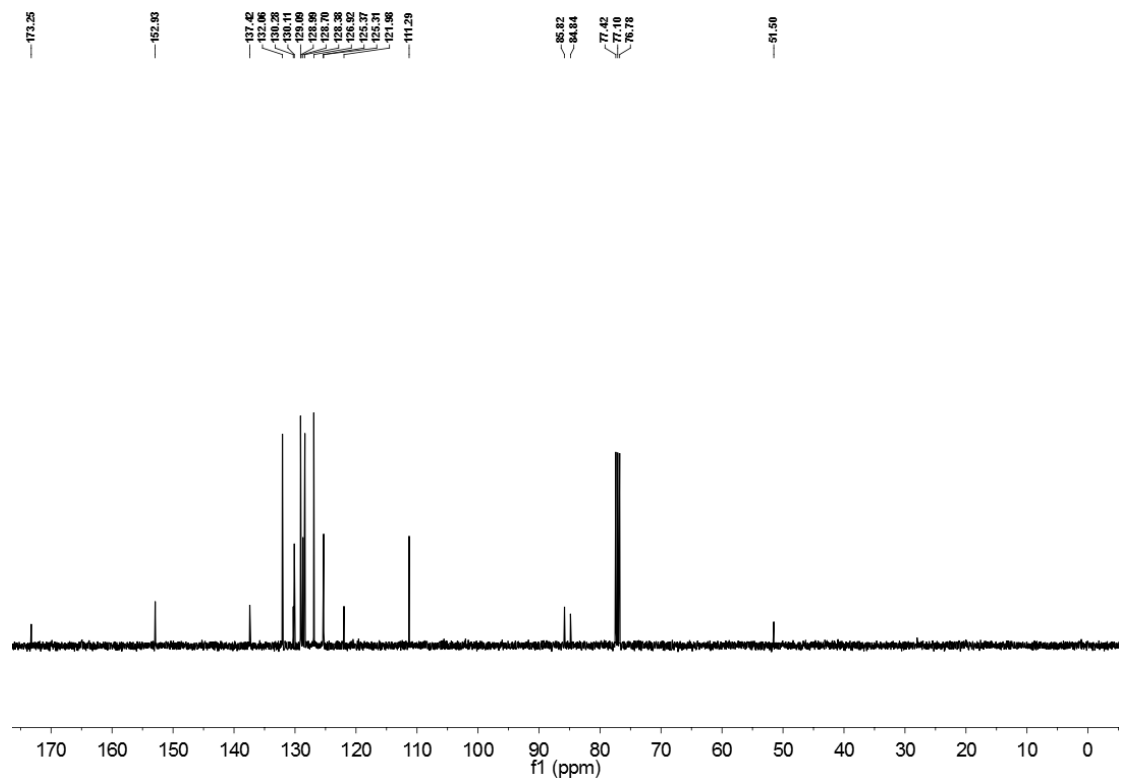

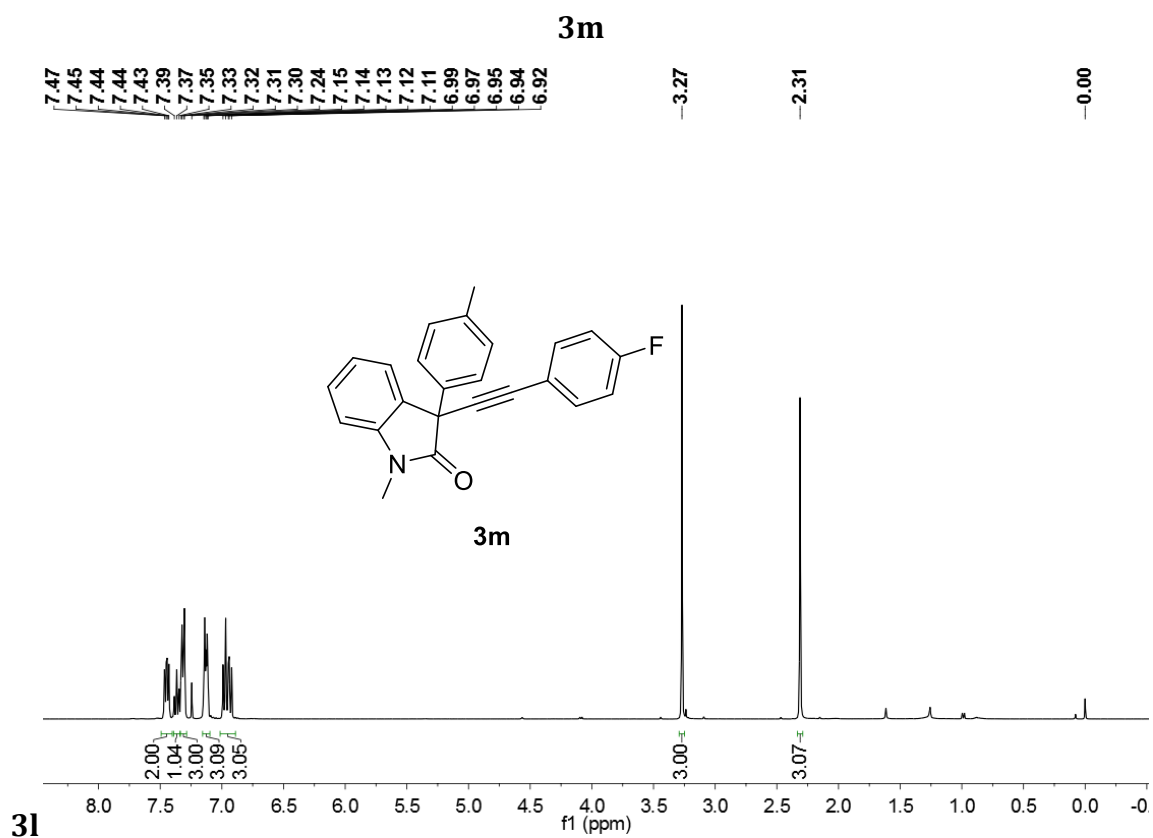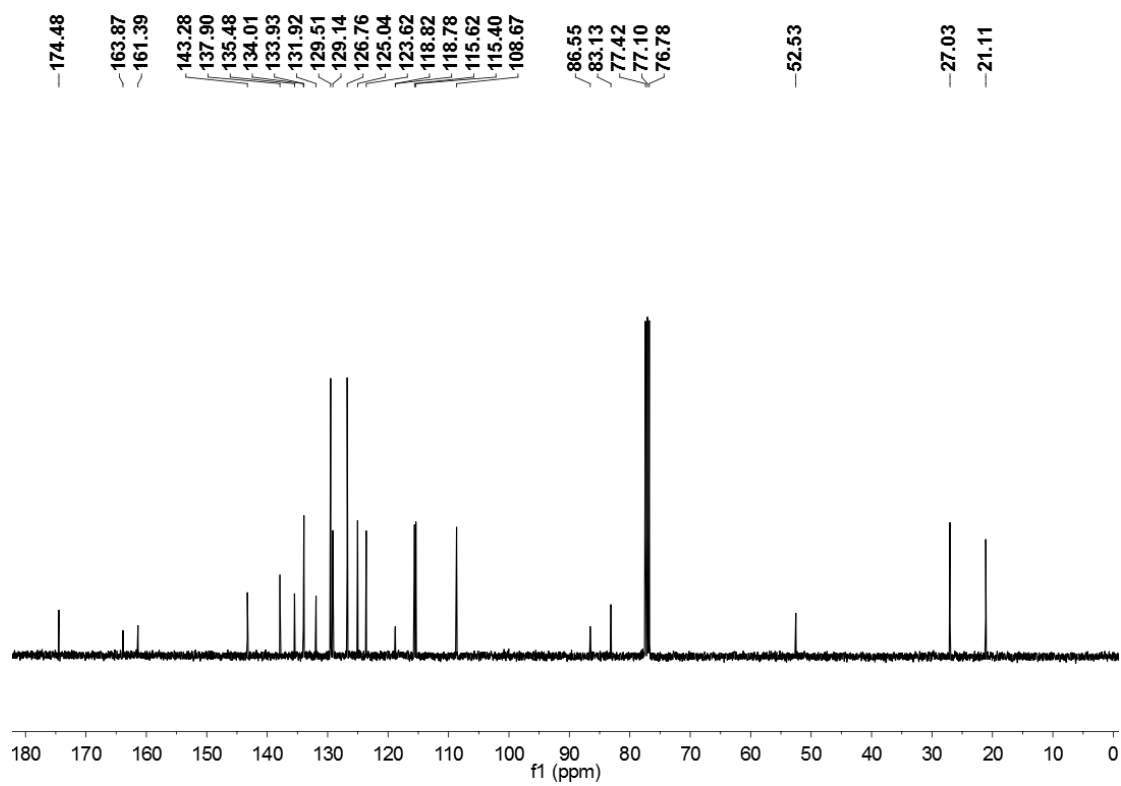



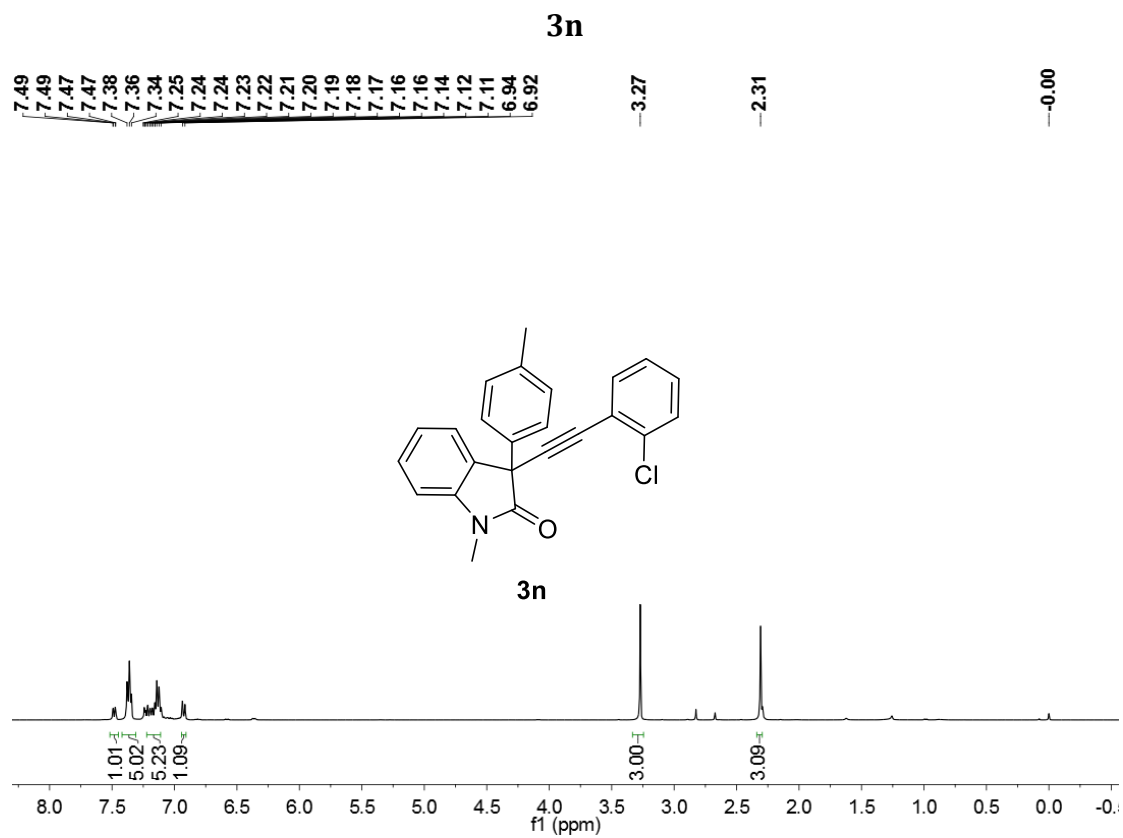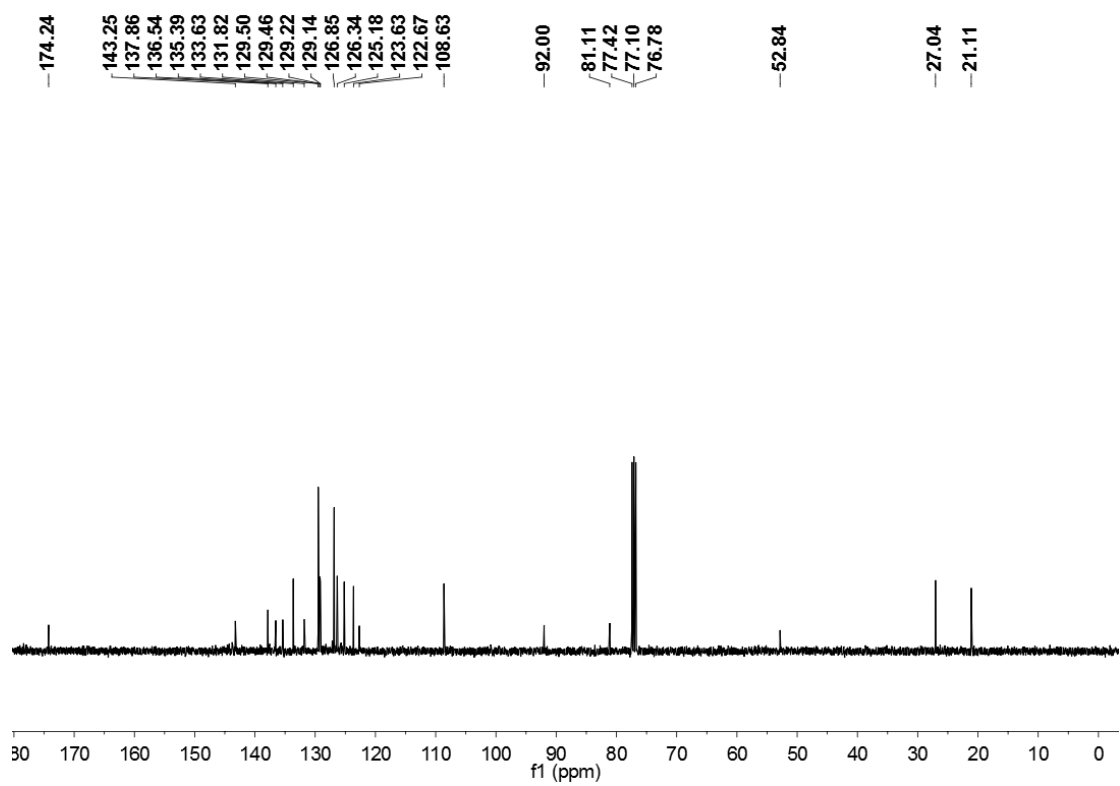

**3o**

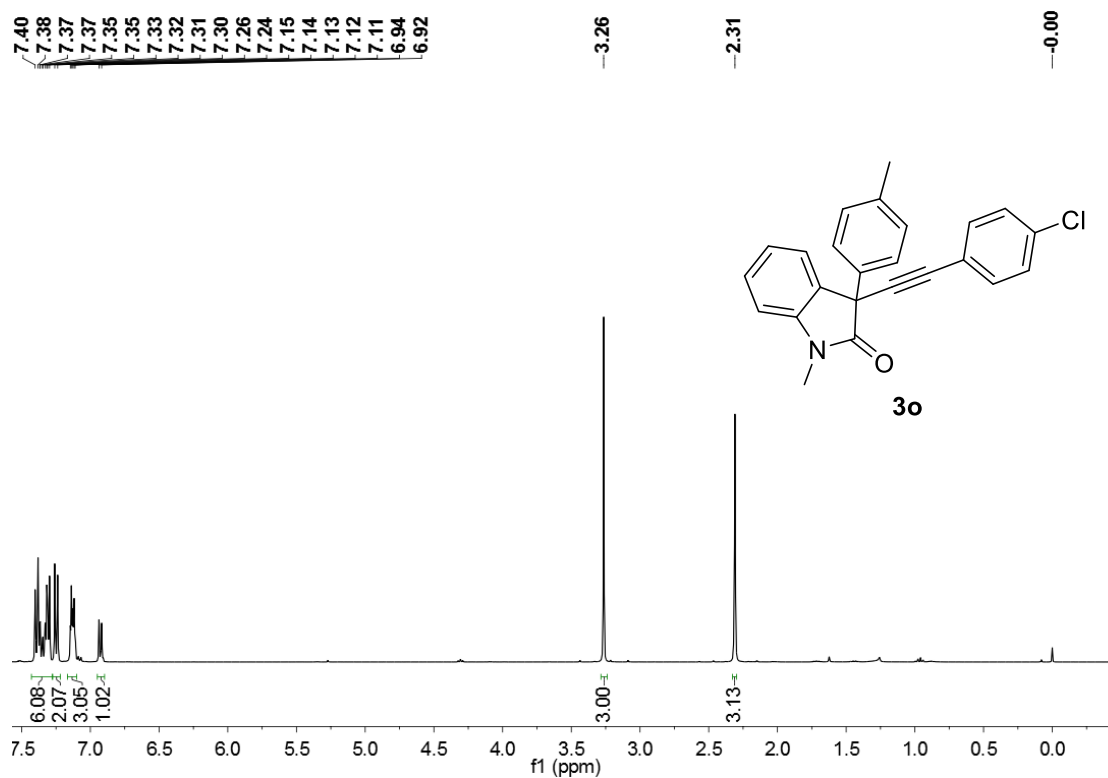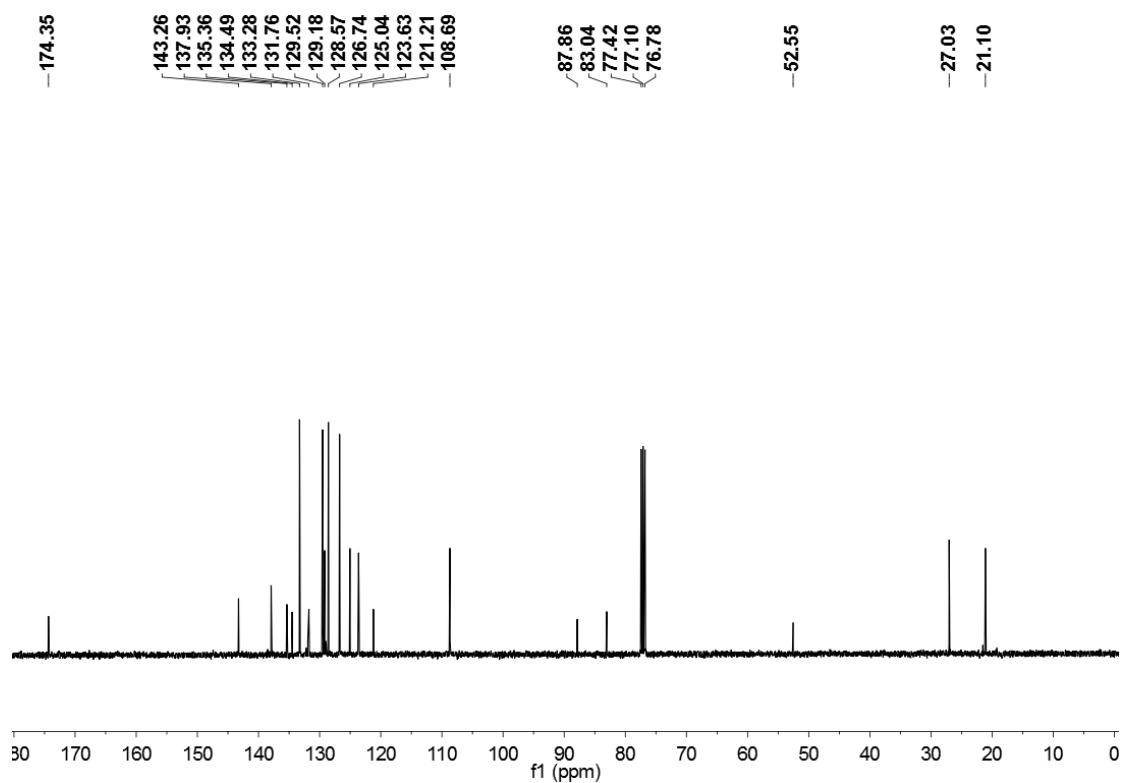

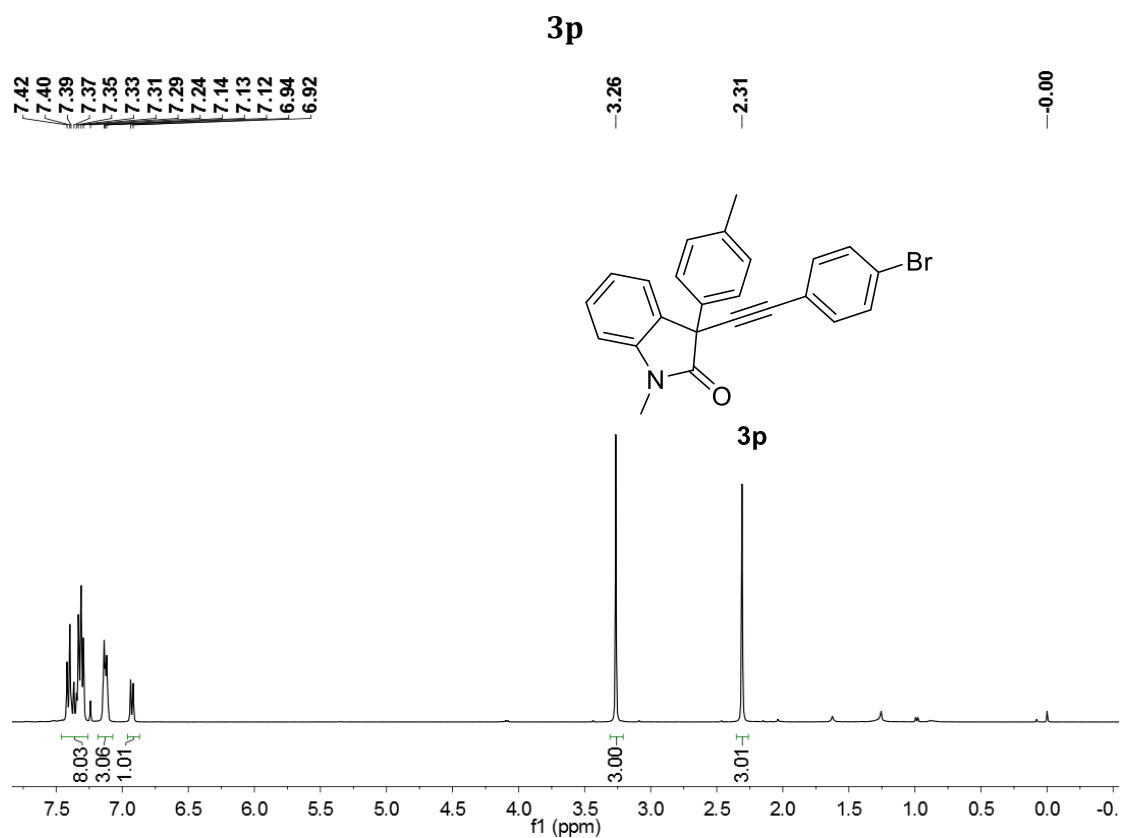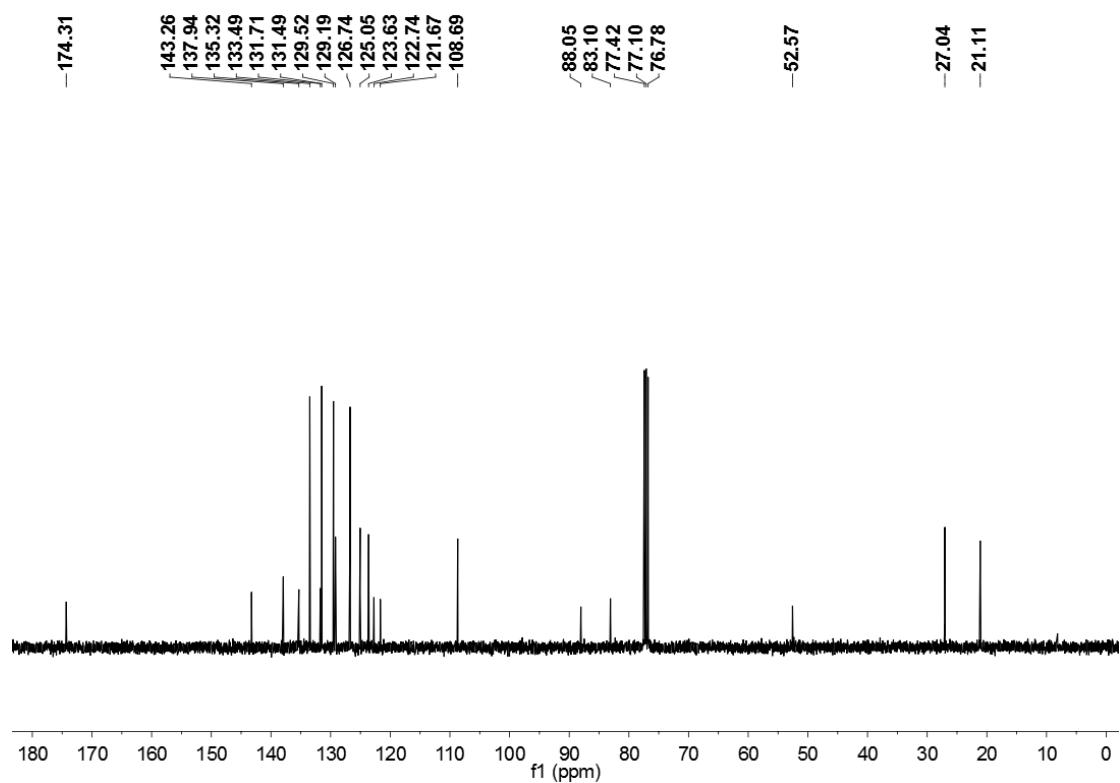

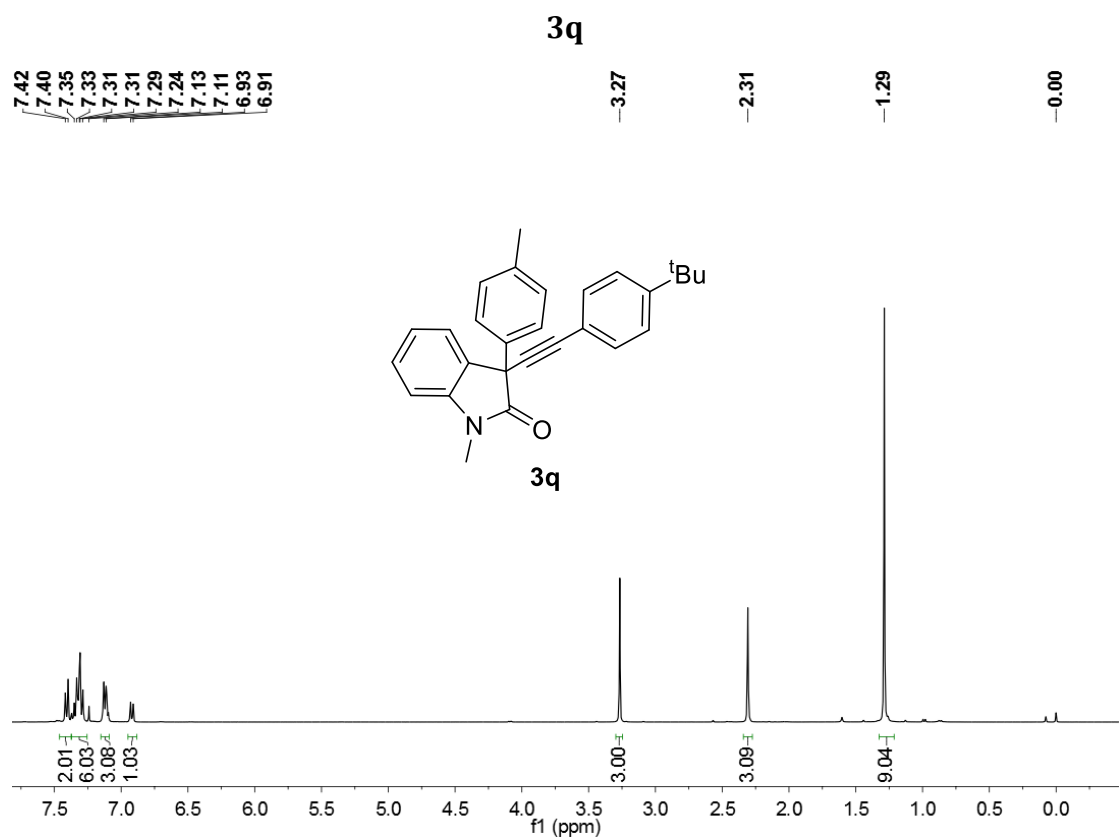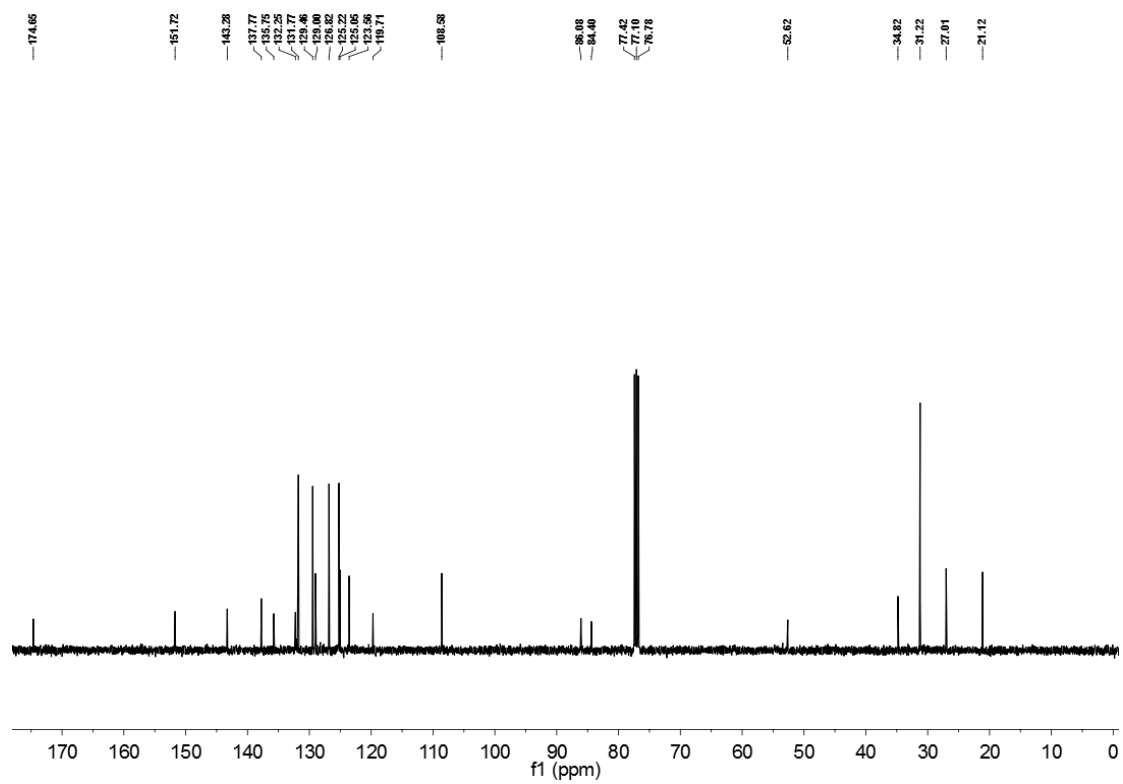

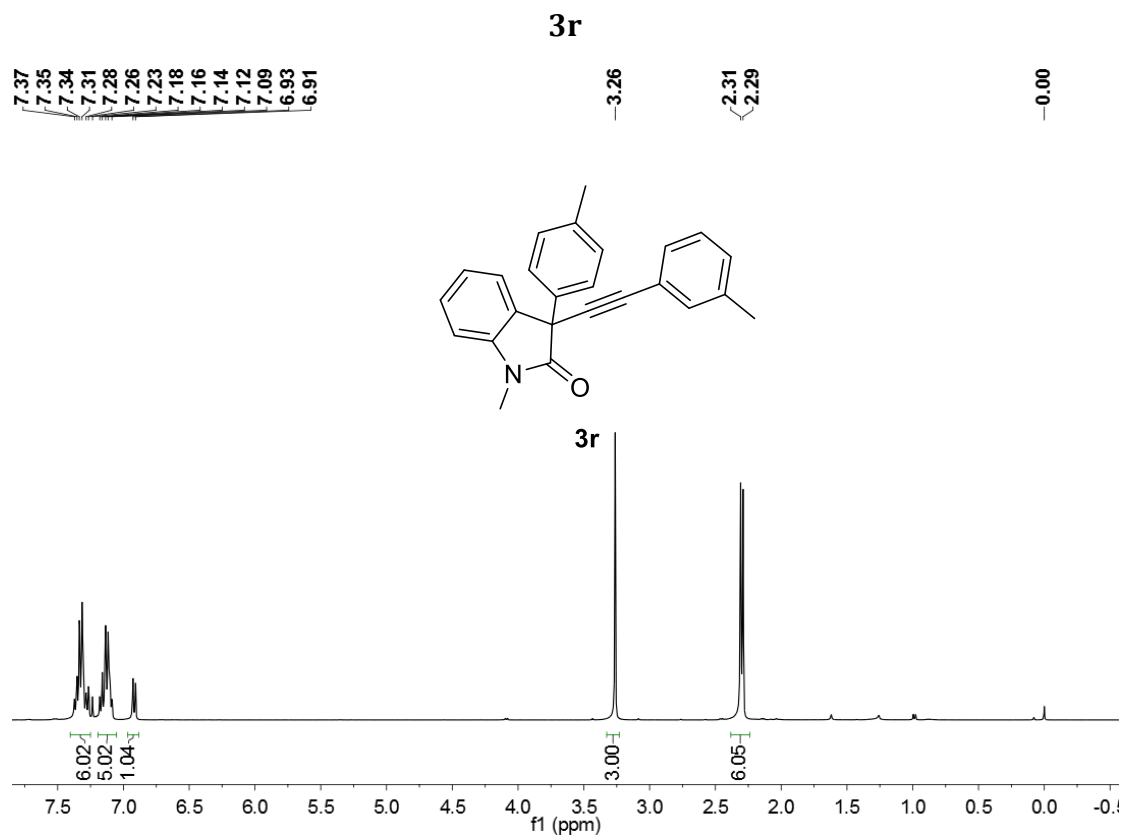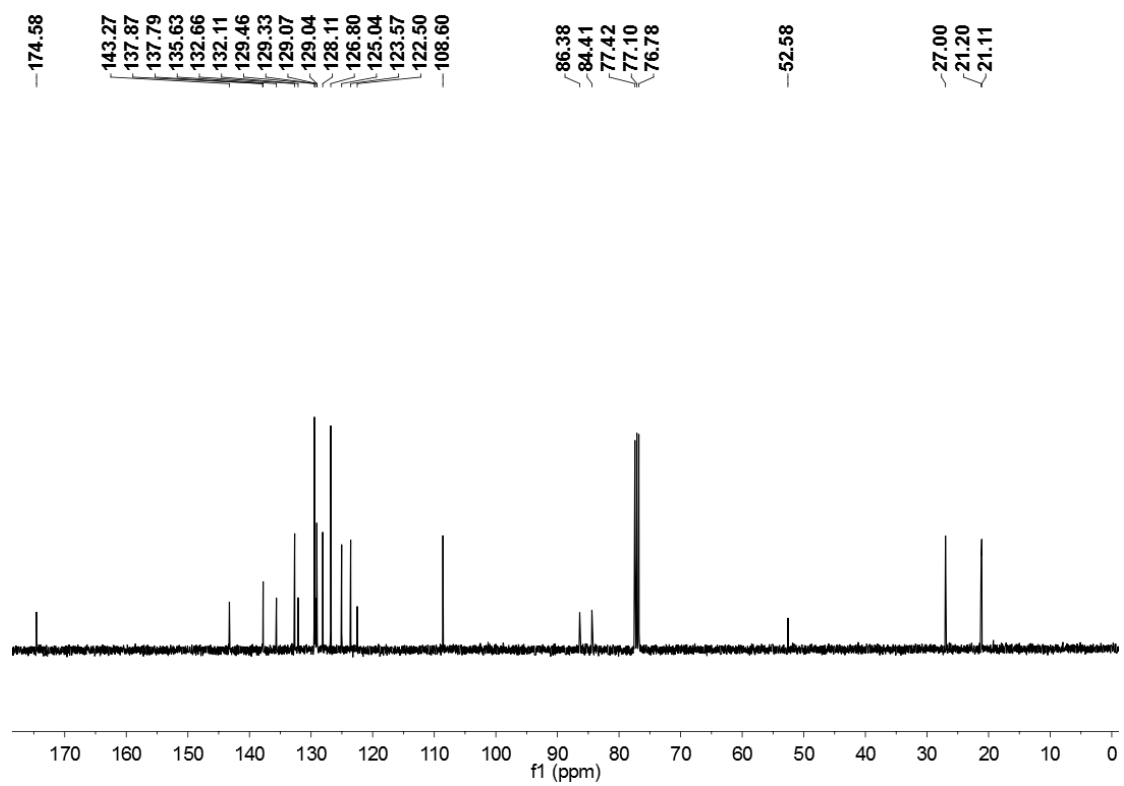

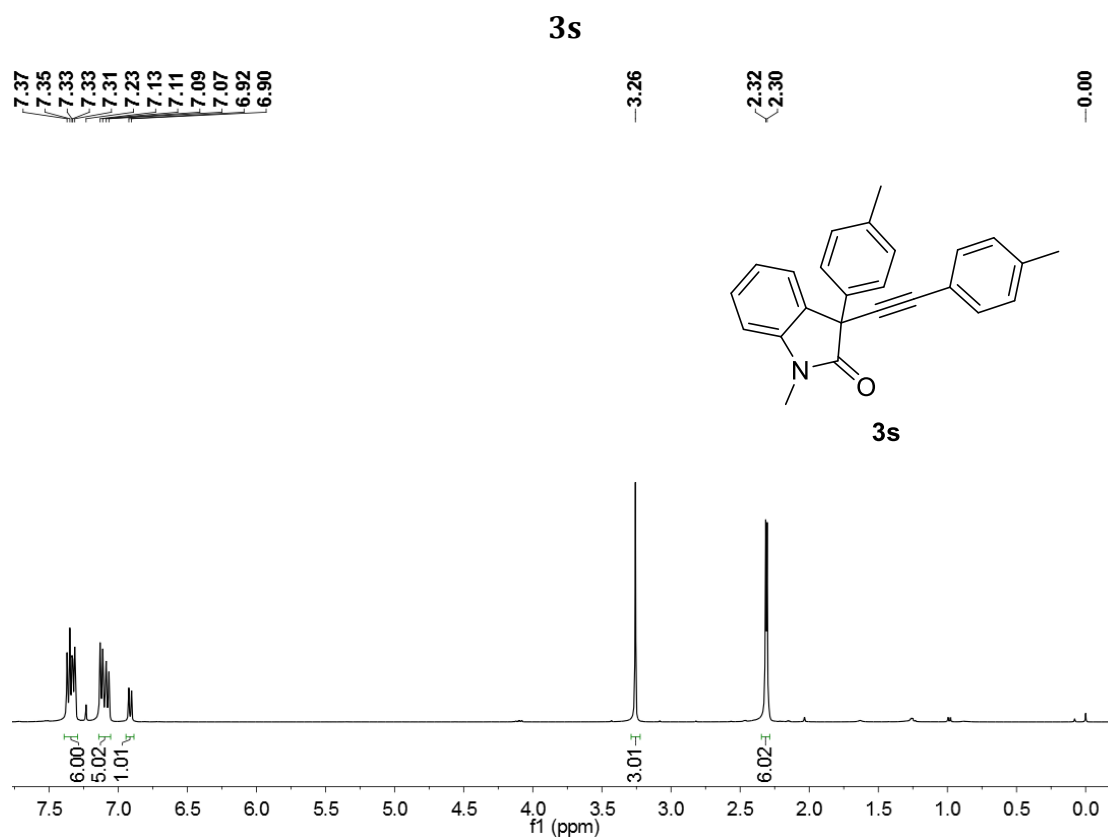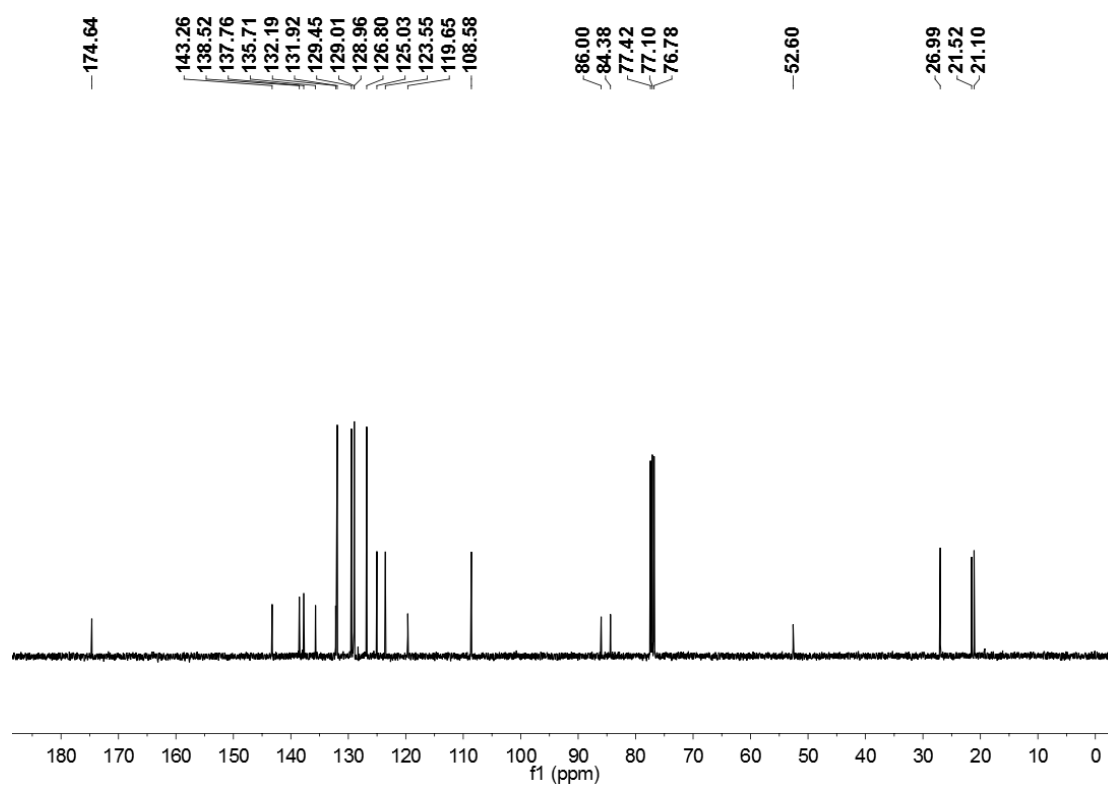

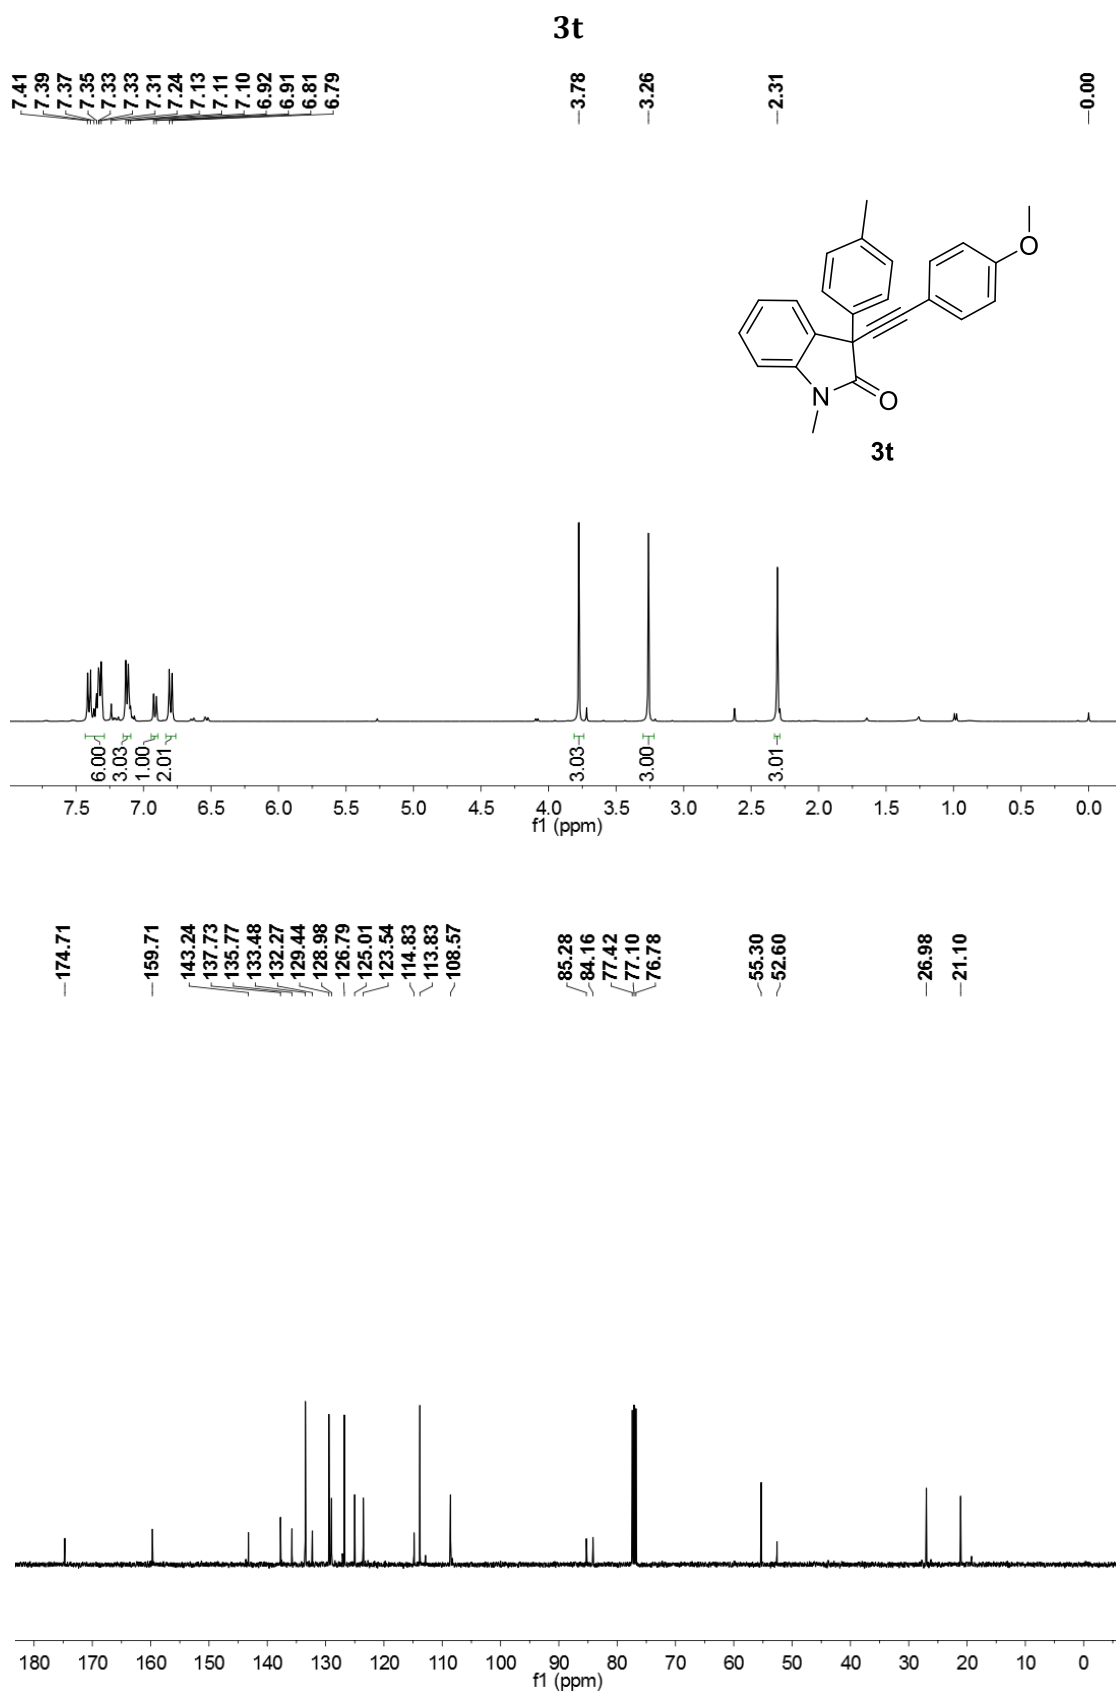

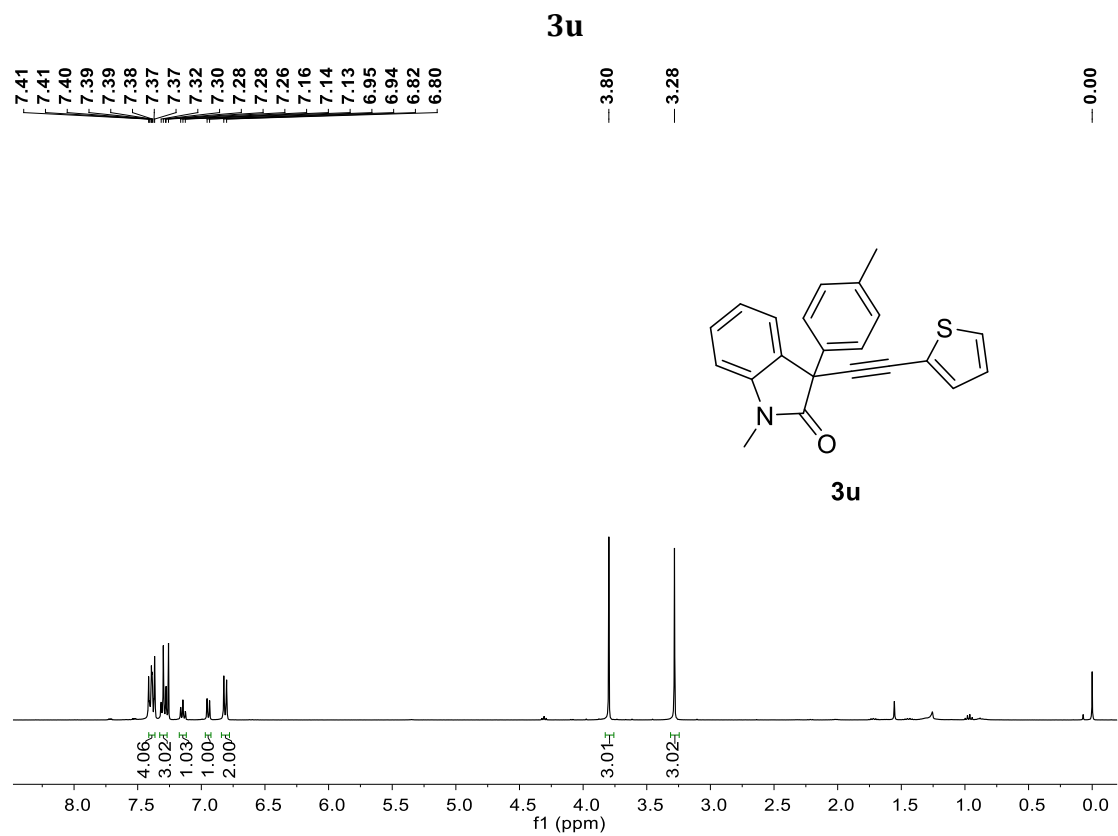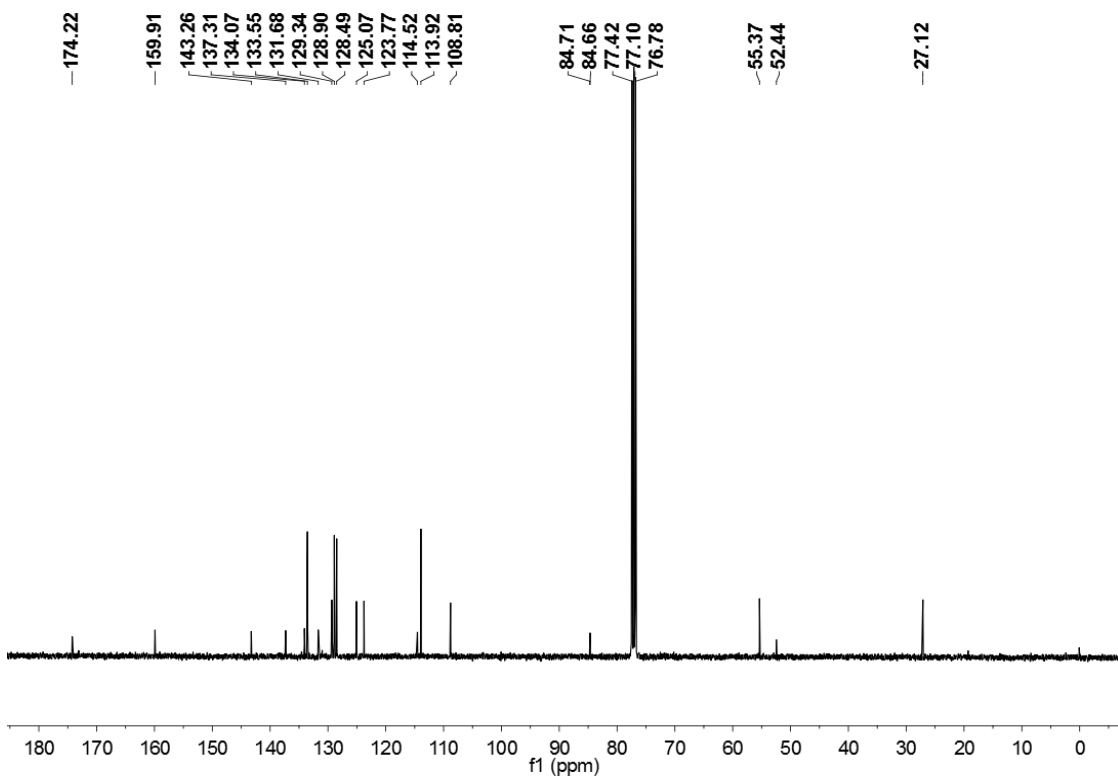



3v

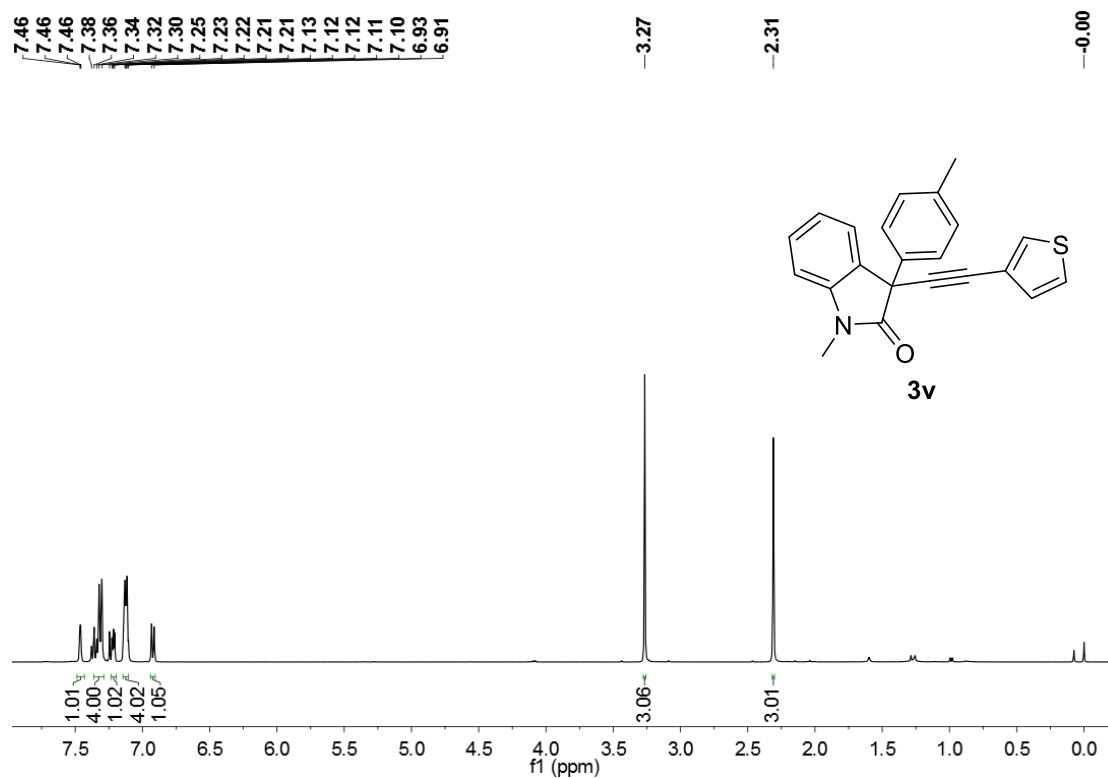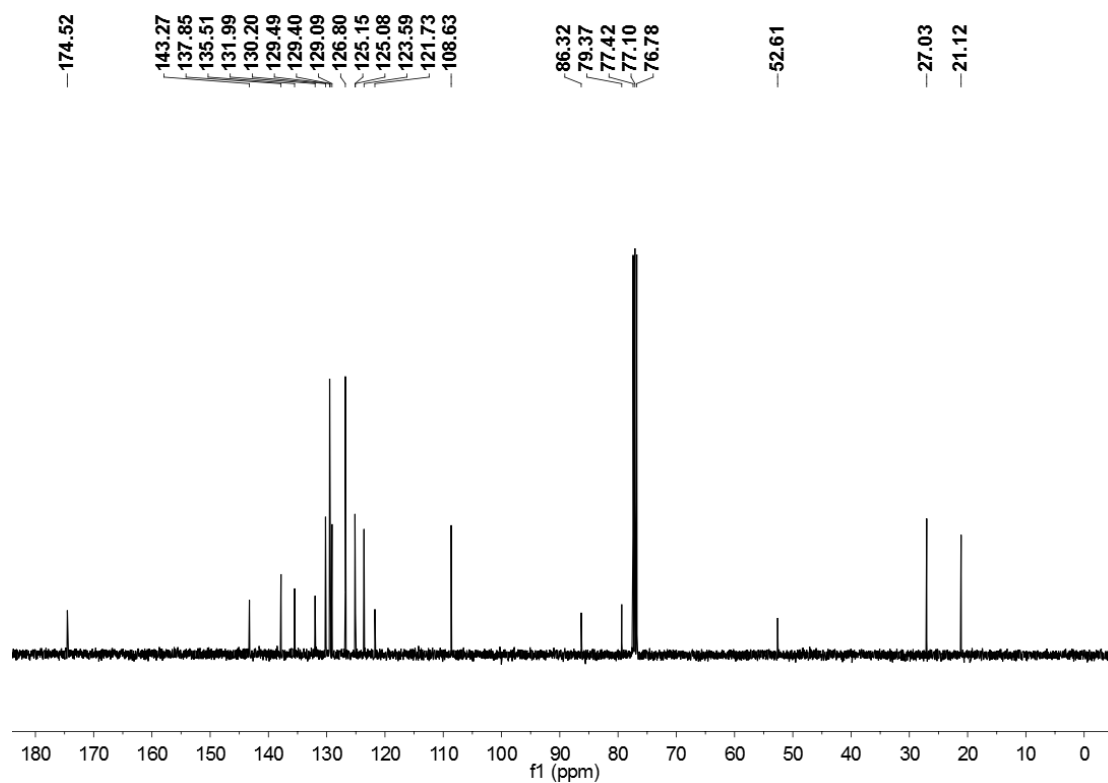

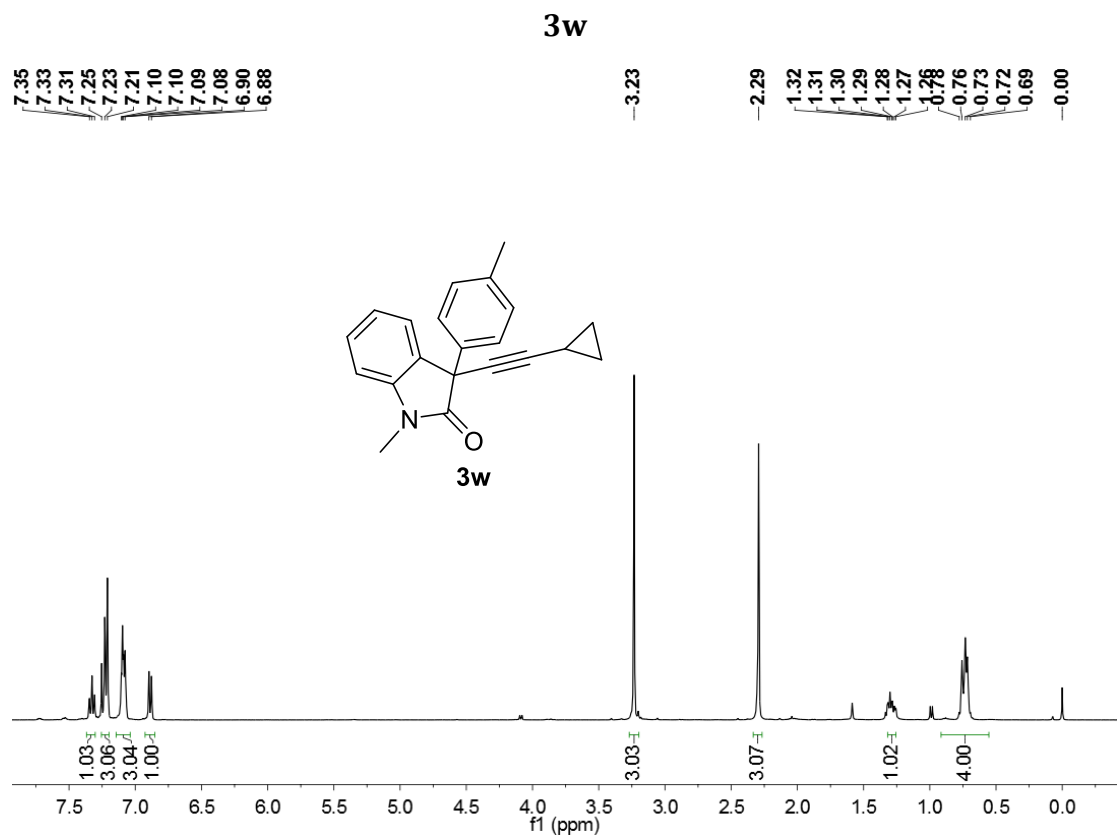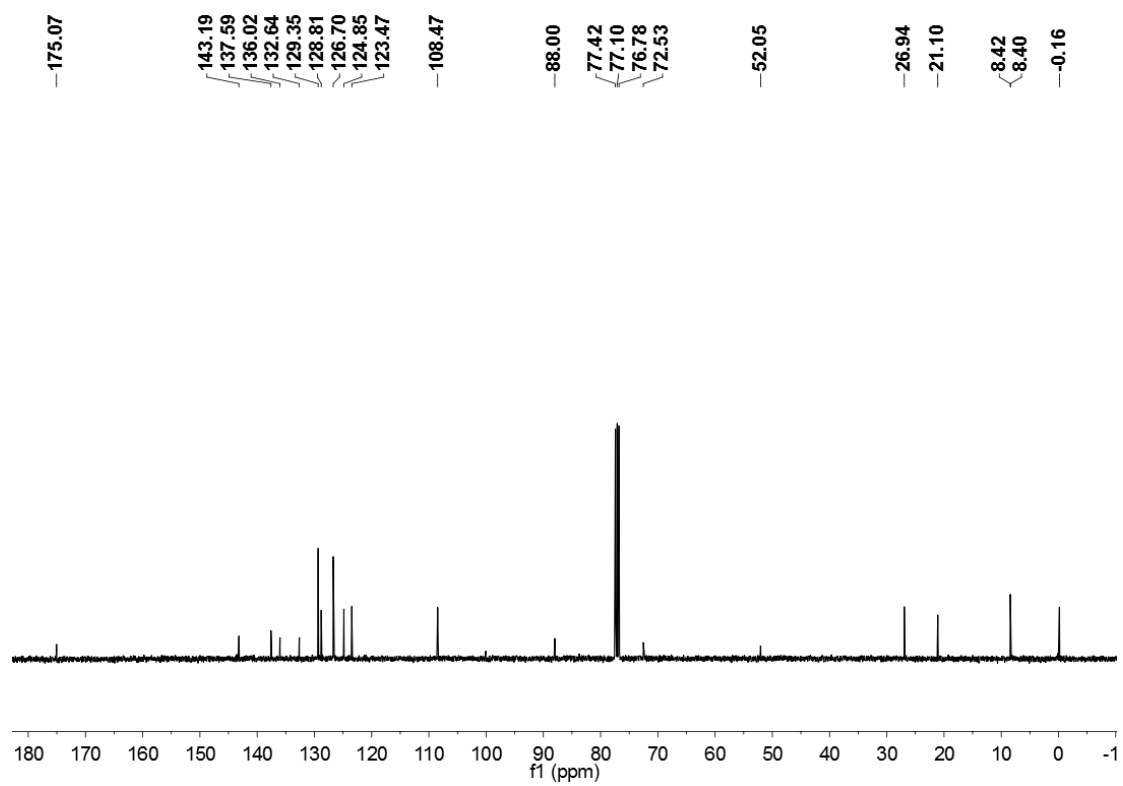

3x

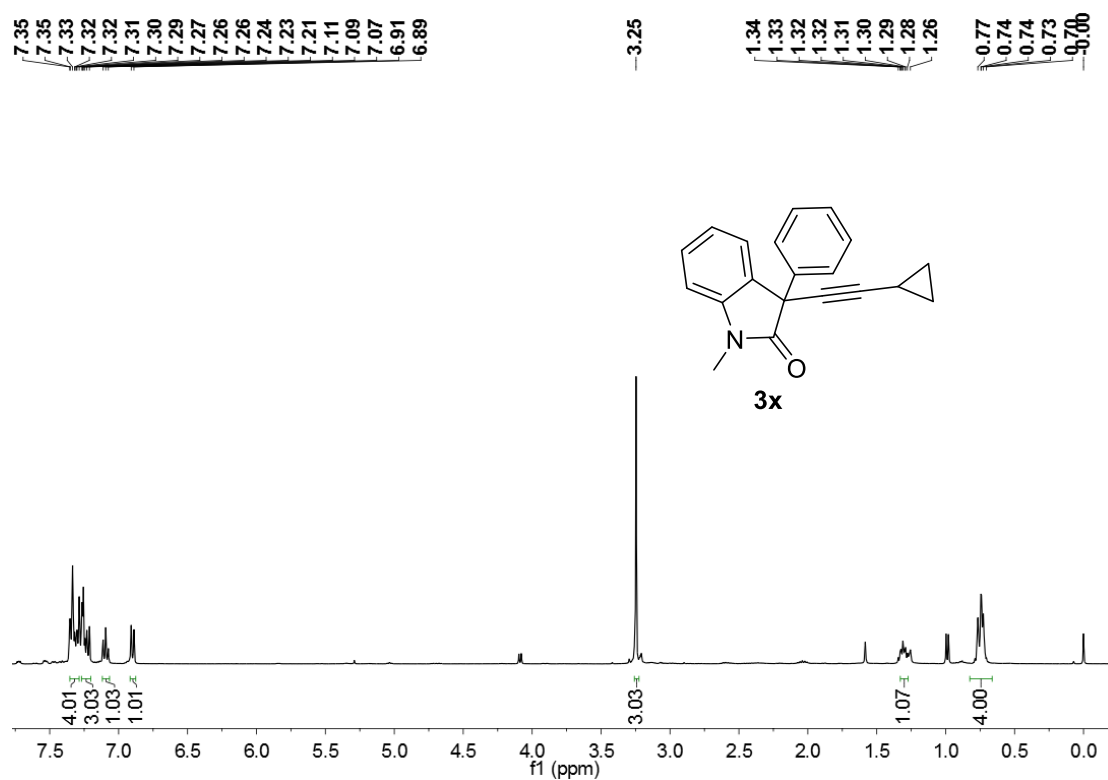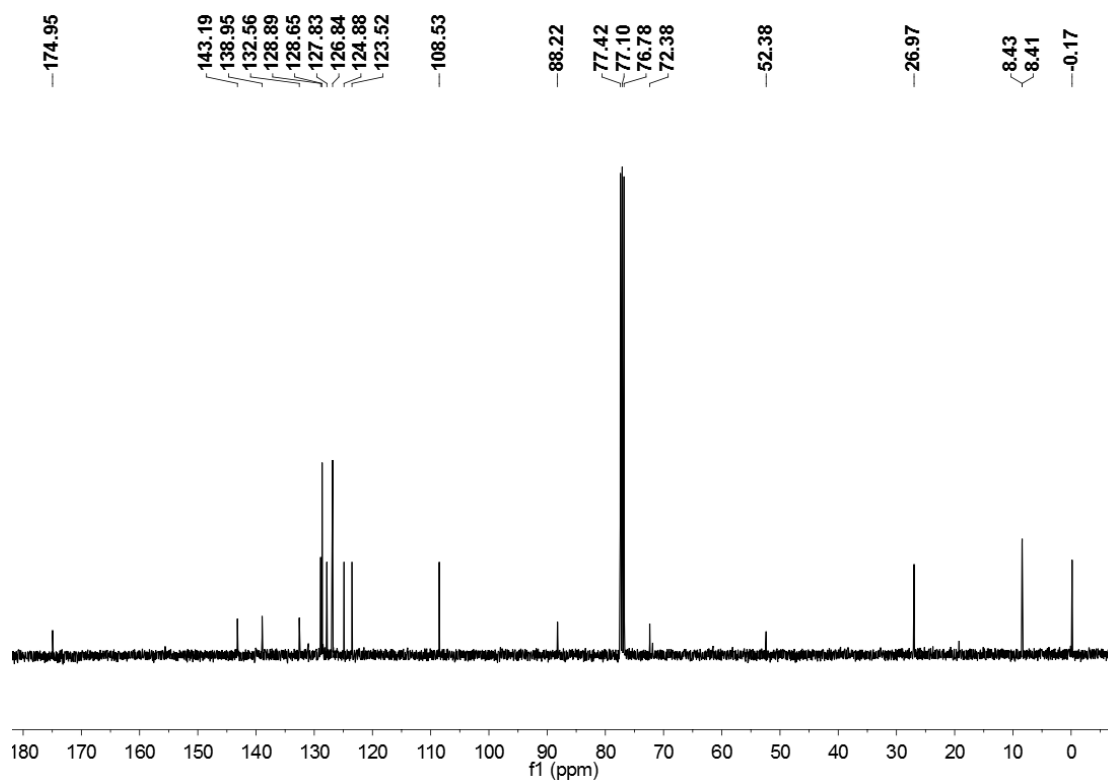

3y

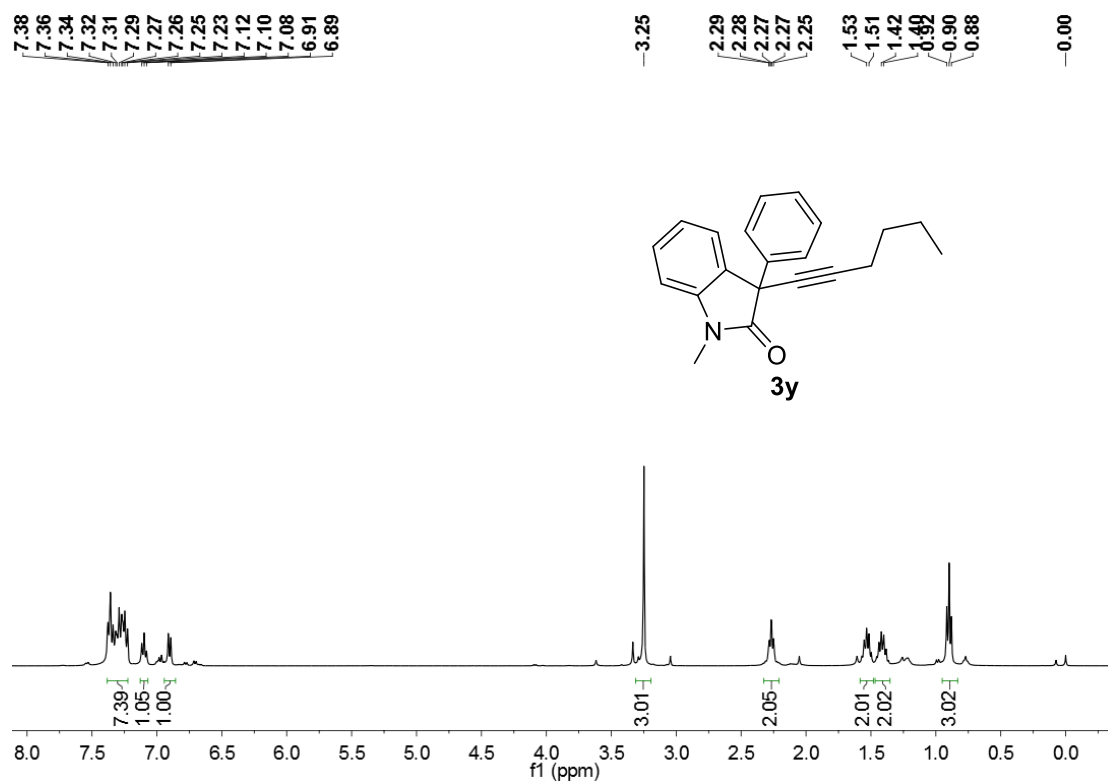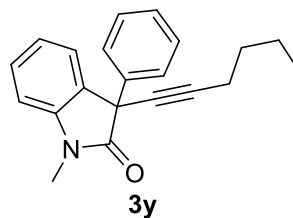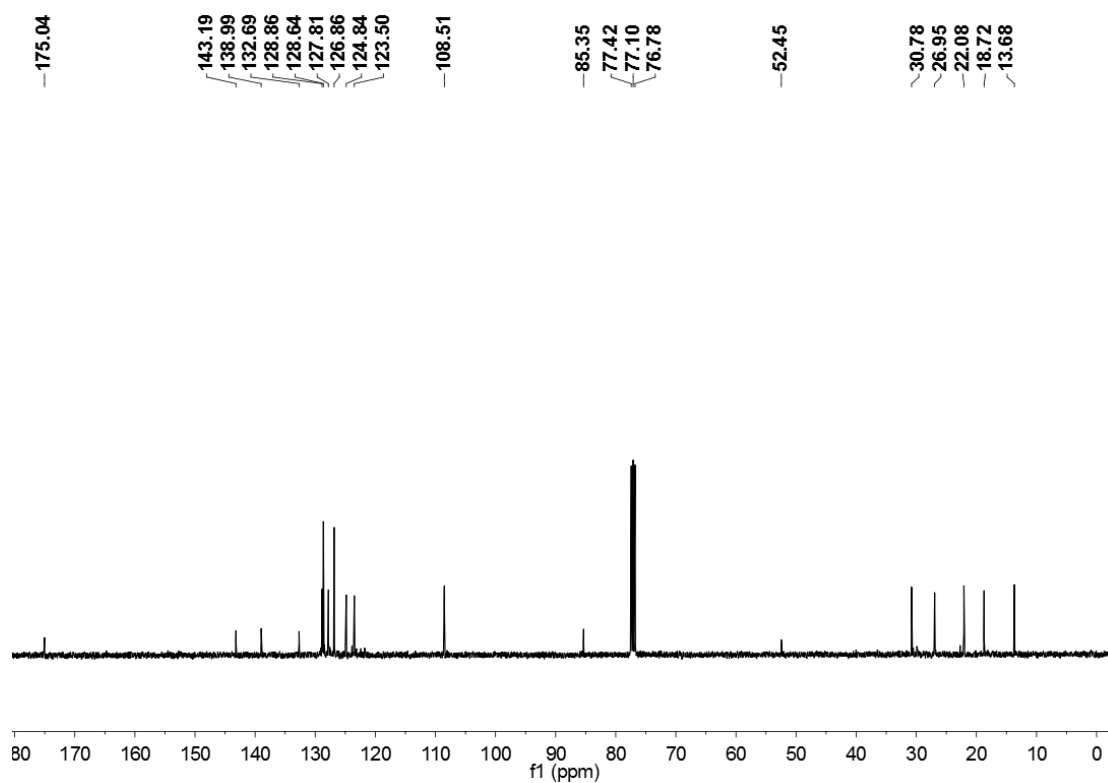

3z

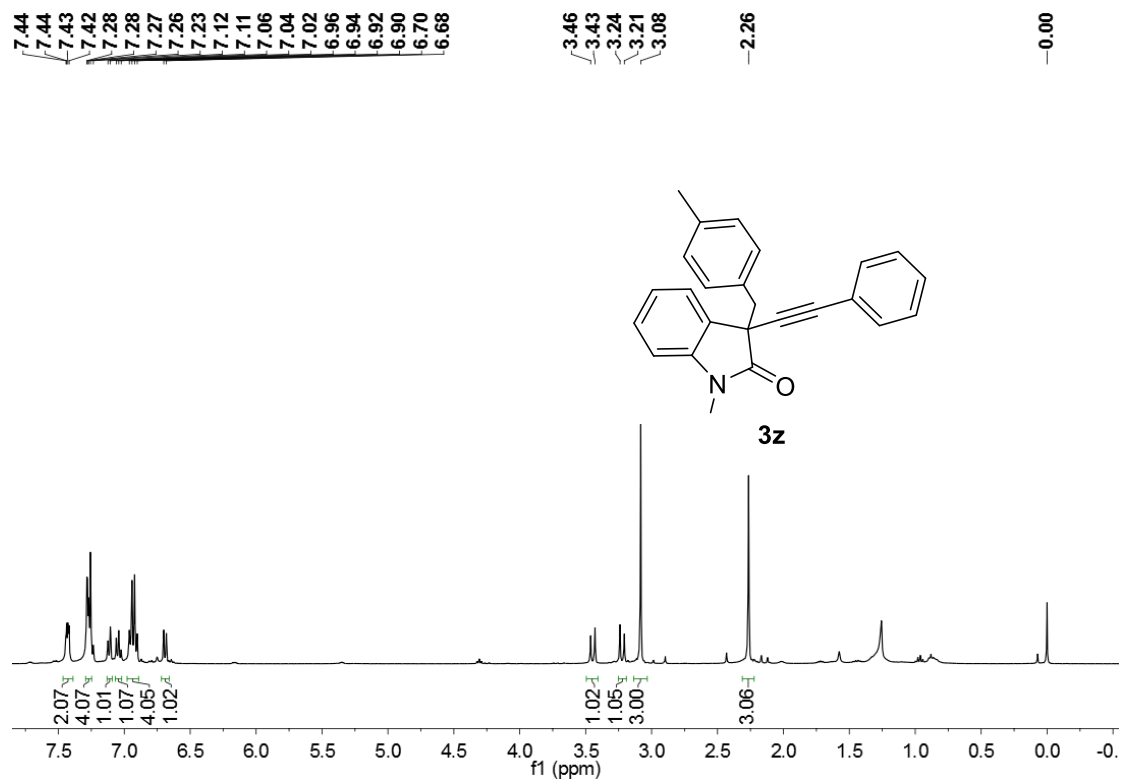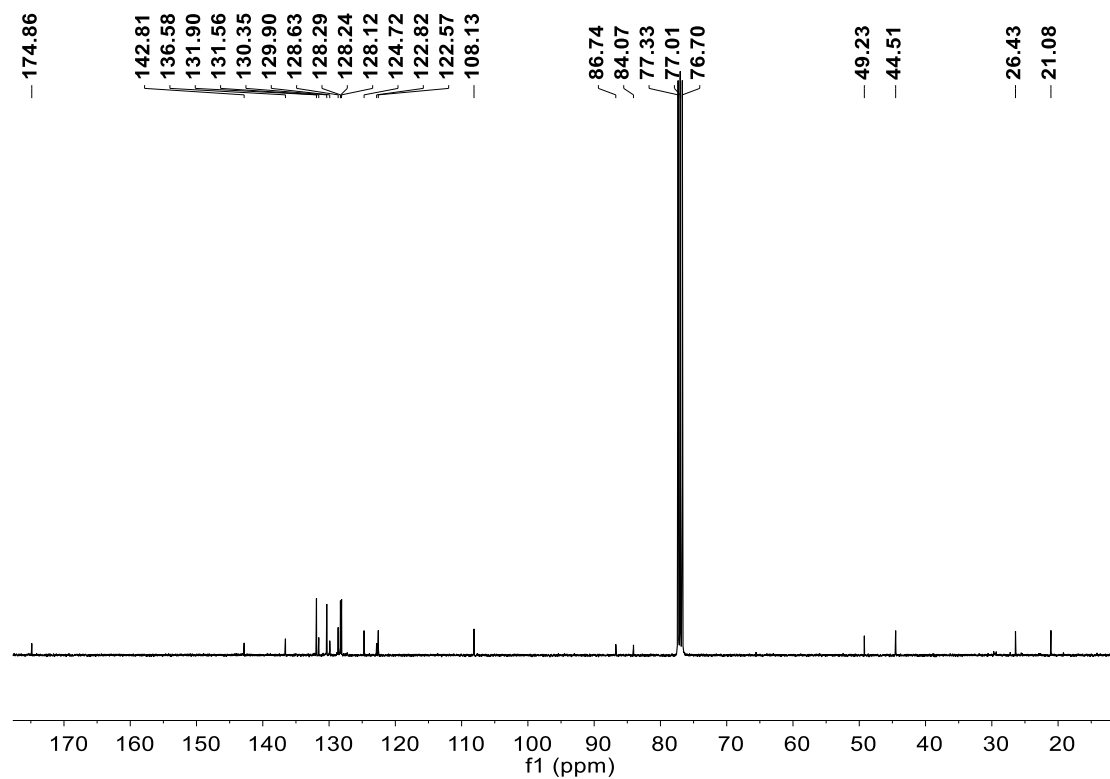

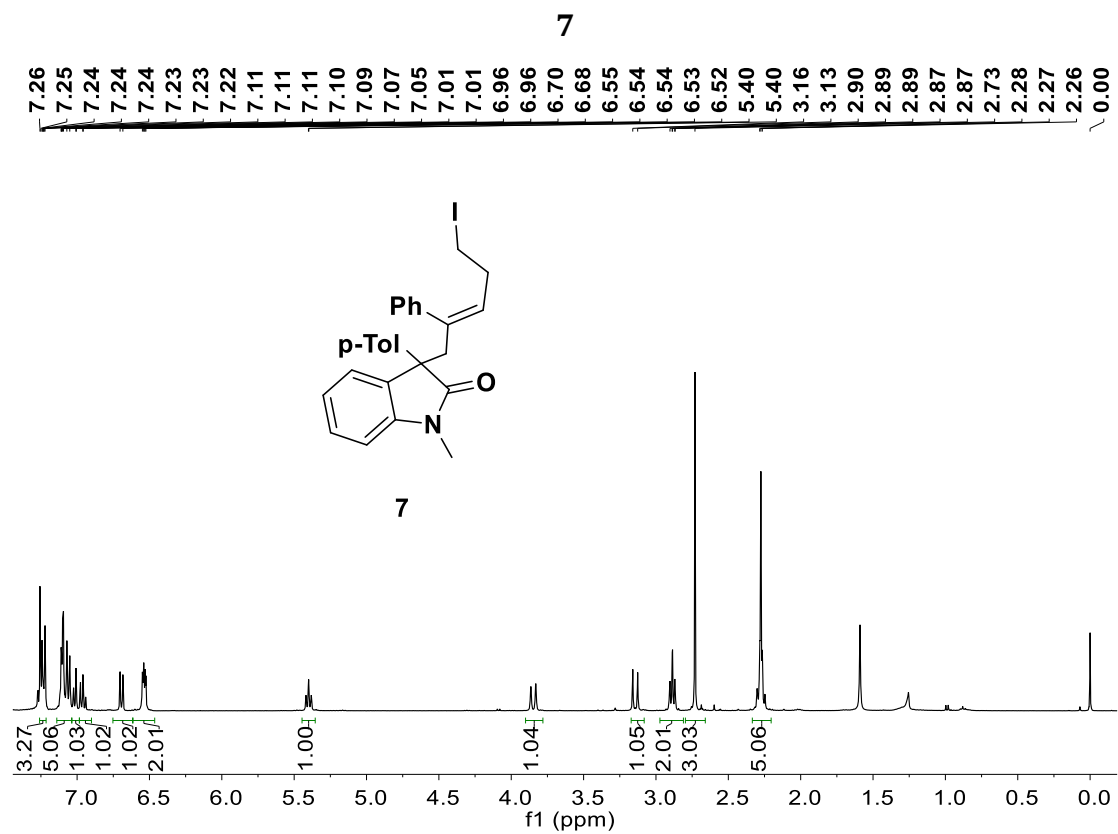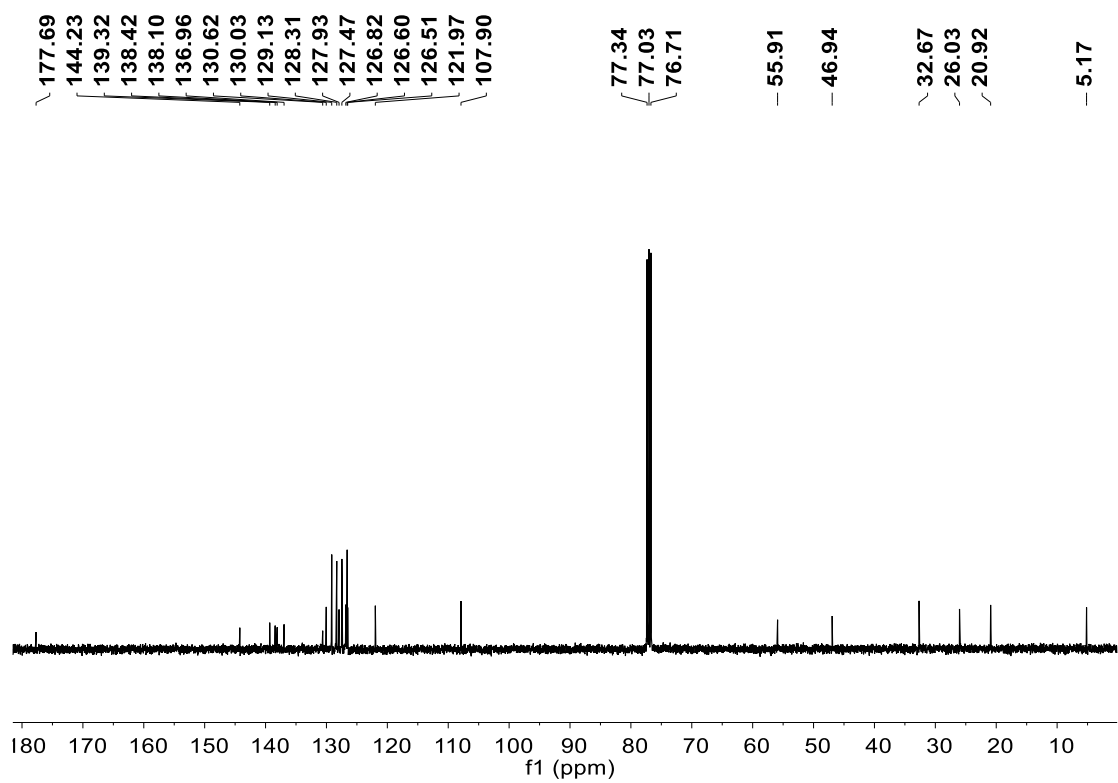

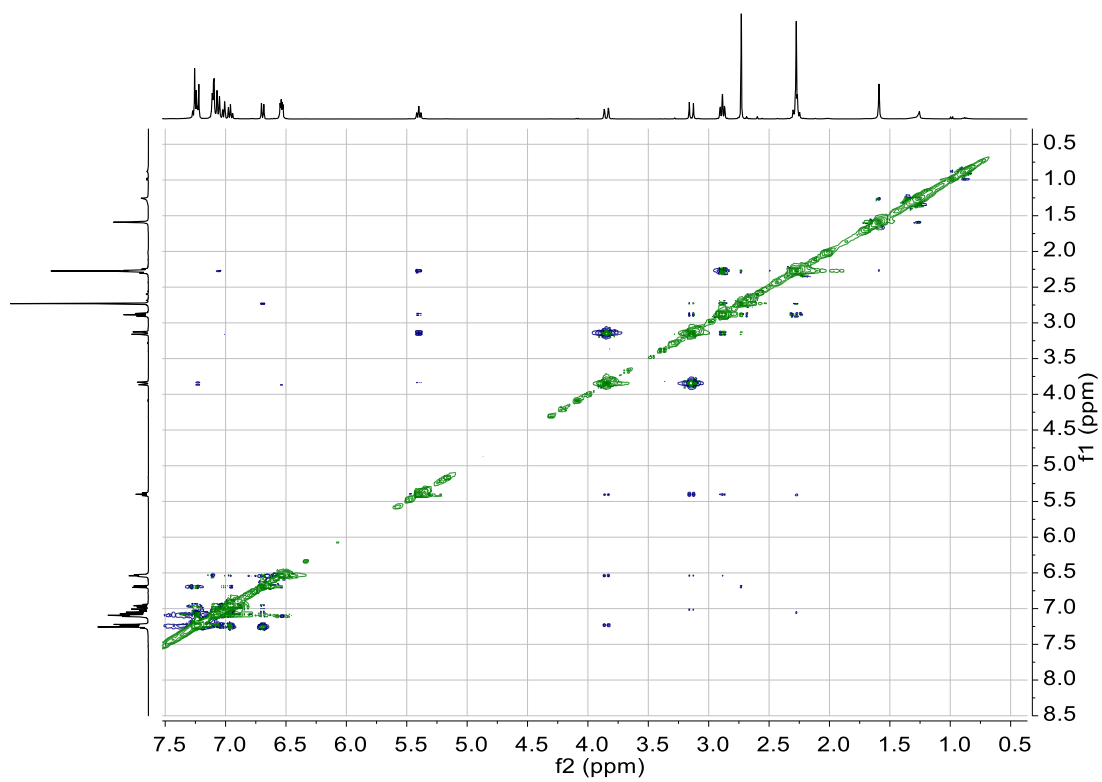

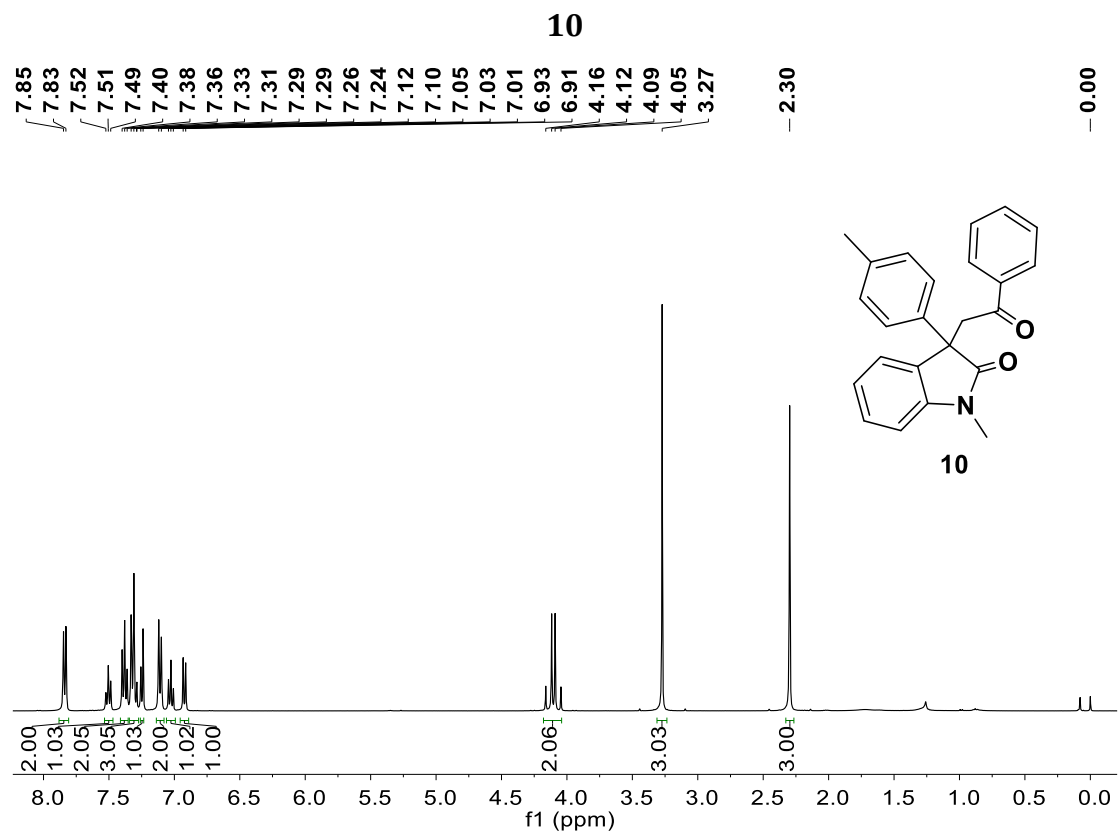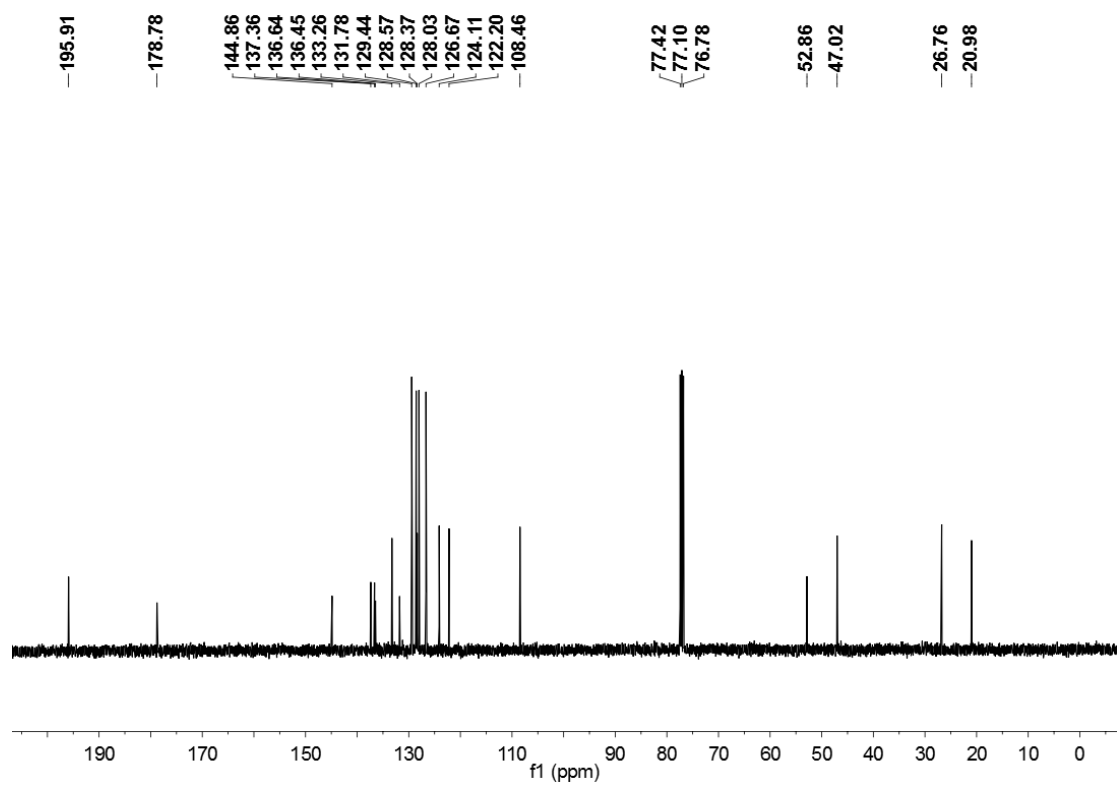



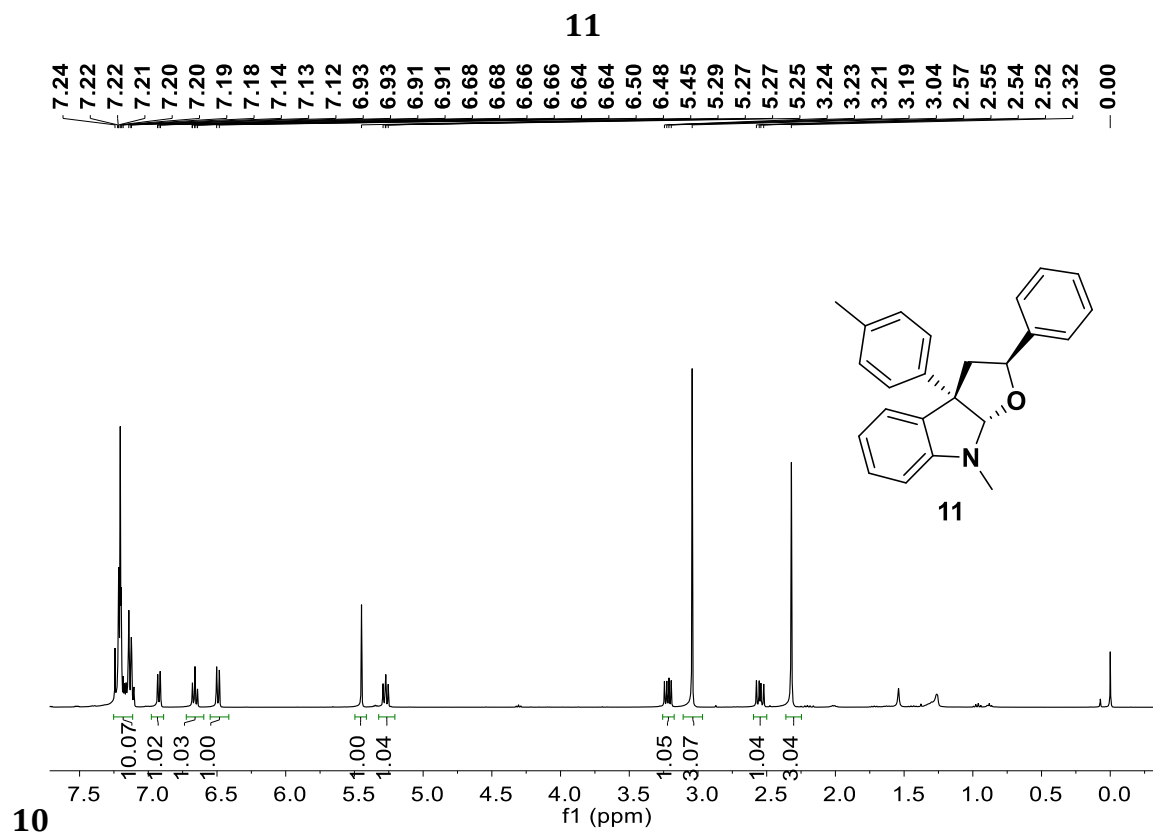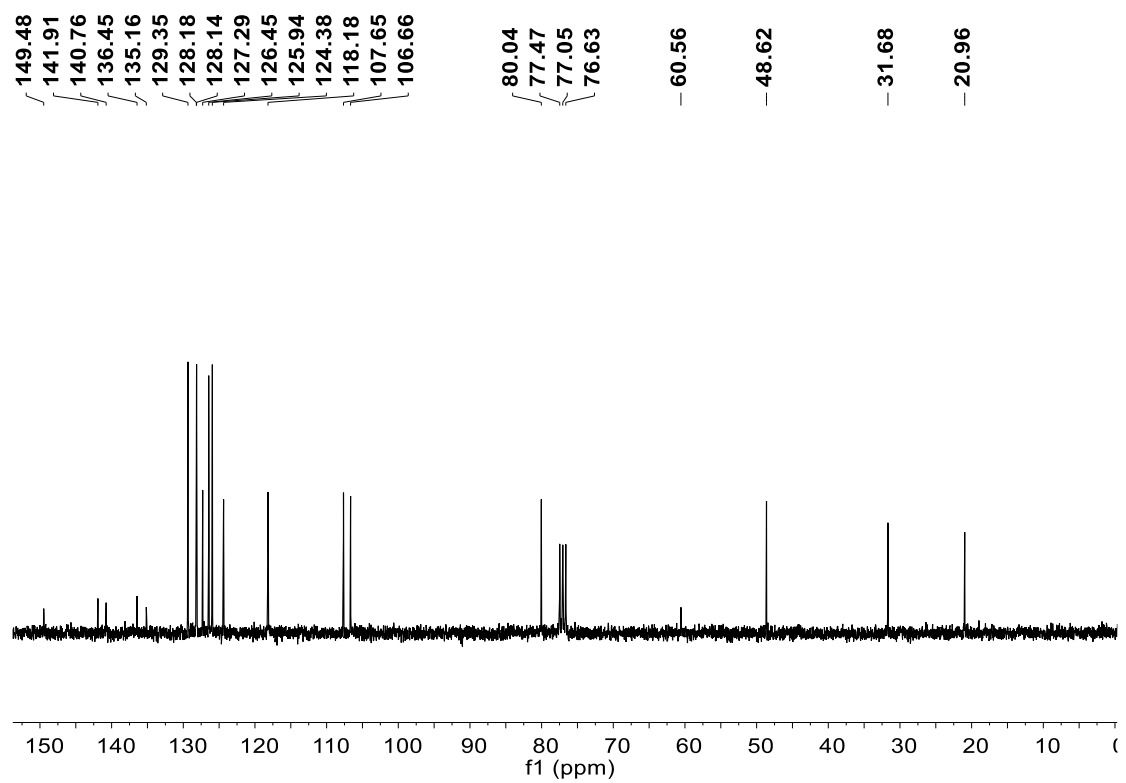

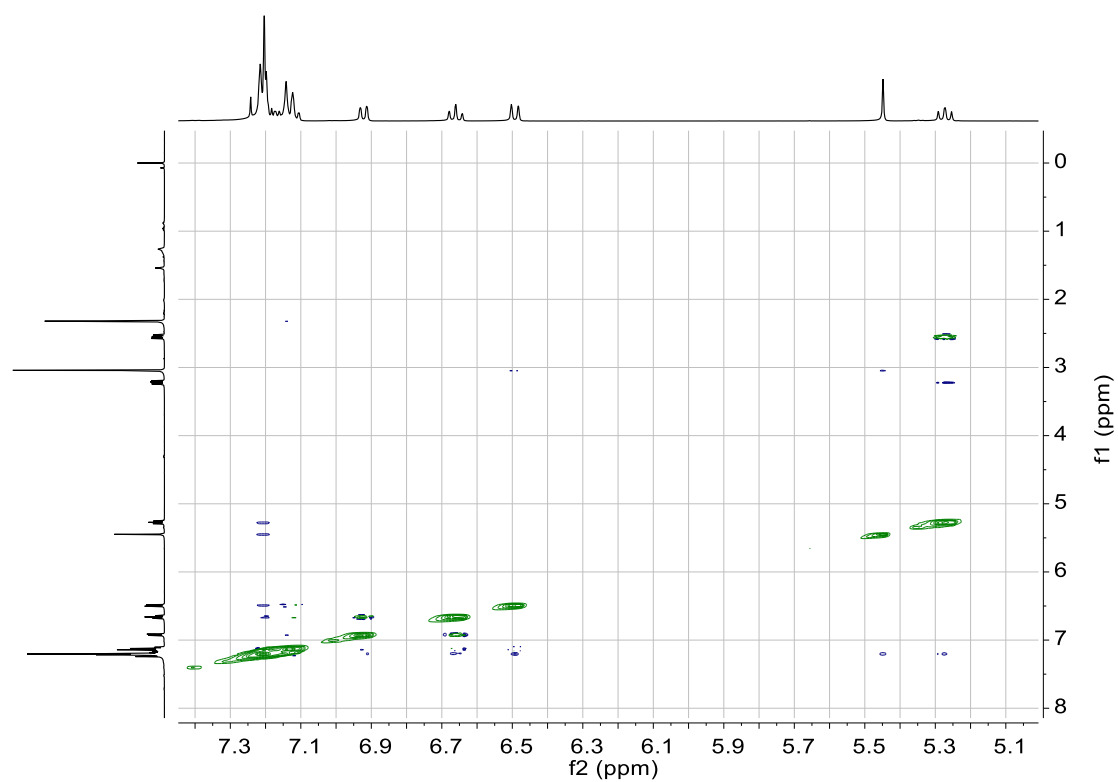

12

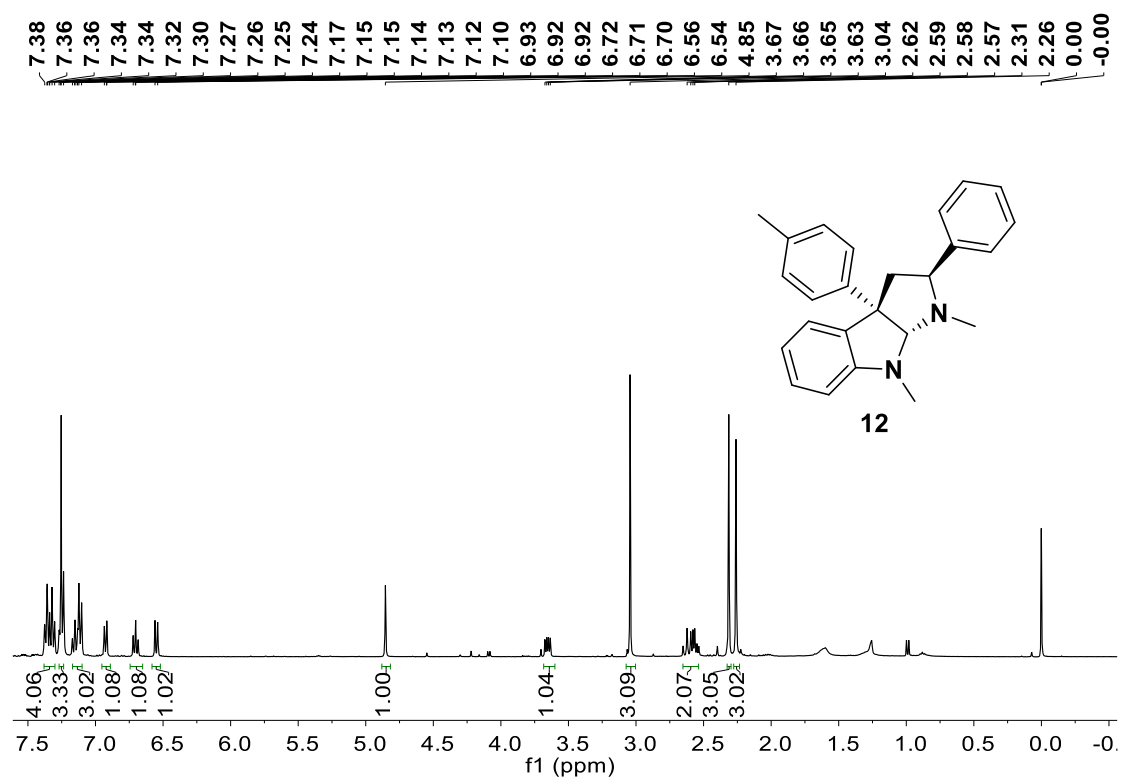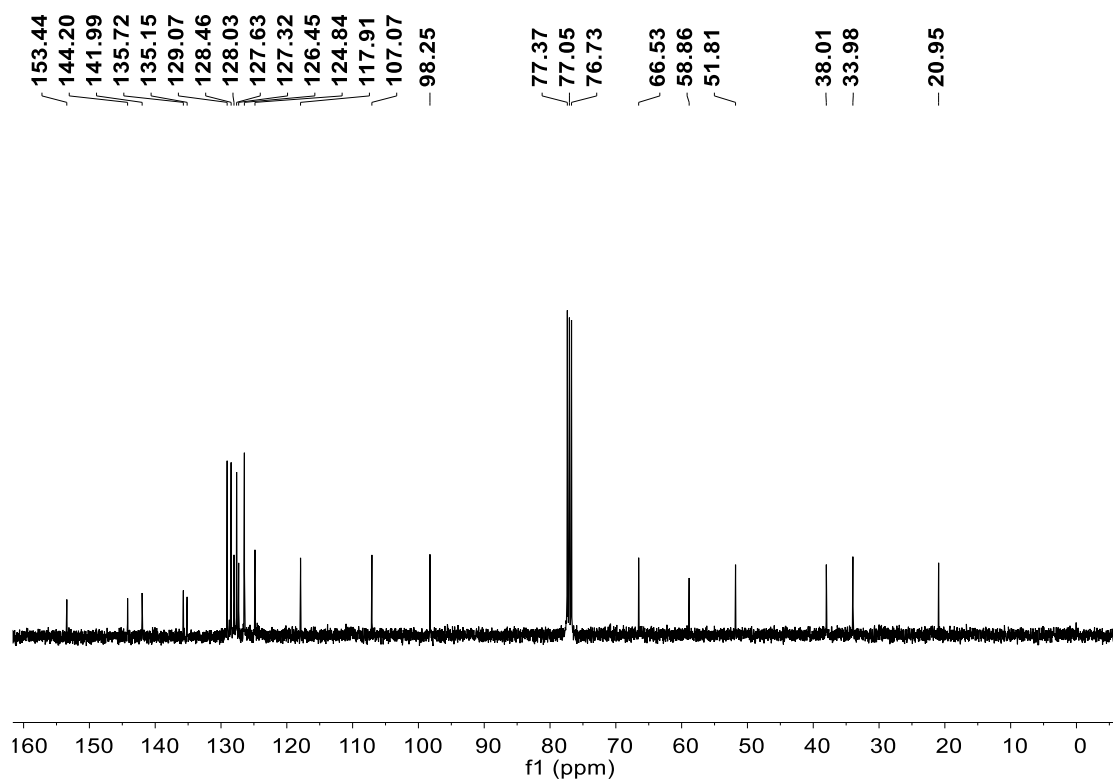

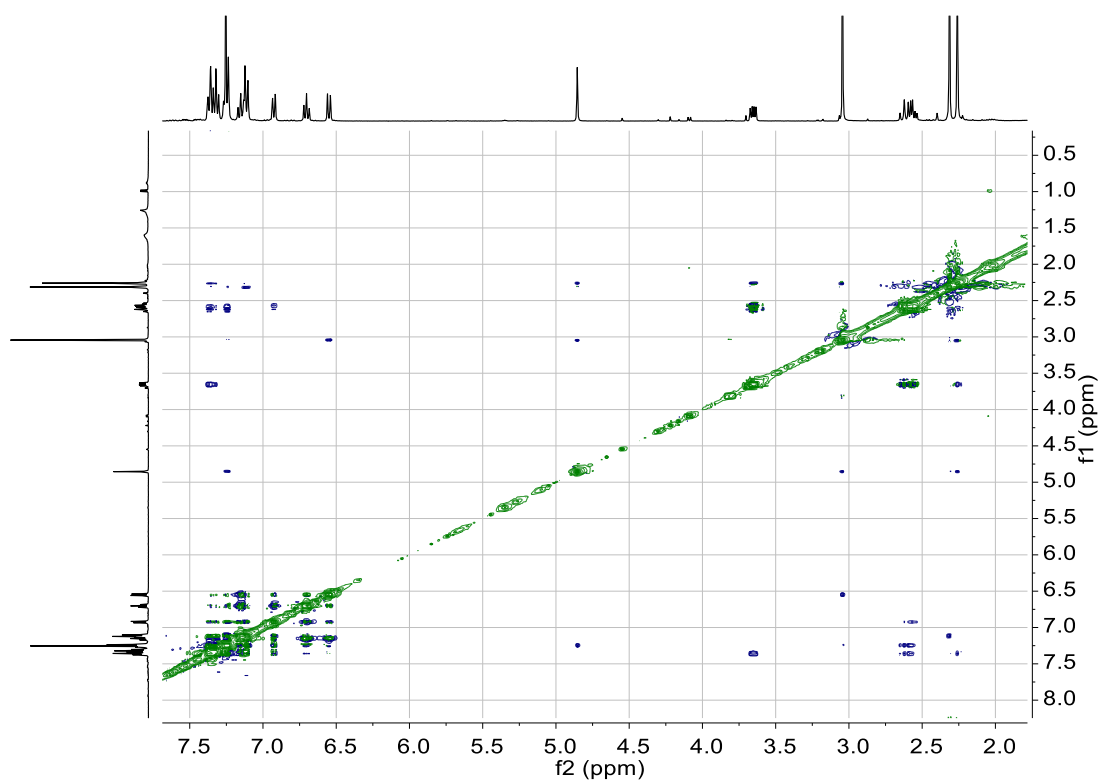

Supplement: Supplementary file 1 [file 7600102]
